# Supplementary material for: Bi-component sensing platform for the detection of Cd2+, Fe2+and Fe3+ ions
Source: Royal Society of Chemistry journal article supplement (doi:10.1039/d4ra04655b), 2024-01-01
Supplement: d4ra04655b1.pdf [file d4ra04655b1.pdf]

## Supporting Information

### Bi-component Sensing Platform for Detection of Cd<sup>2+</sup>, Fe<sup>2+</sup> and Fe<sup>3+</sup> ions

Jagajiban Sendh, and Jubaraj B. Baruah

---

#### List of Captions

---

- Figure S1 Concentration dependent UV-visible spectra of the (a) Naphydrazide and (b) Binaphydrazide in DMF showing a decrease in absorptions upon dilution.
- Figure S2 UV-visible titration of Naphydrazide (3.32 μM, in DMF) showing increase in the absorbance at 335nm upon addition of Fe<sup>2+</sup> ions (each time addition of 10 μL solution of 1 mM ferrous acetate in water).
- Figure S3: (a) UV-visible titration of solution of 2,6-H<sub>2</sub>pdc ( 3.32 μM, 3 mL in DMF) showing increase in absorbance at 270 nm upon addition of 10-80 μL Fe<sup>2+</sup> ions (1 mM in water) and then addition of 10-80 μL of solution of Cd<sup>2+</sup> ions (1mM in water); (b) Same experiment by reversing the addition of the ions.
- Figure S4 Figure S4: UV-visible titration of 2,6-H<sub>2</sub>pdc (3.32 μM in DMF) solution with each time addition of 10 μL solution of 1 mM (a) Fe<sup>2+</sup> (b) Fe<sup>3+</sup> ions. (c) is the plot of concentration vs absorbance at 270 nm for Fe<sup>2+</sup> and at 315 nm for Fe<sup>3+</sup> of the figures (a) and (b).
- Figure S5 UV-visible titrations of a solution of Naphydrazide together with 2,6-H<sub>2</sub>pdc (both, 10 μL from 3.32 μM stock solution in DMF added to 2mL DMF ) upon addition of (a) Fe<sup>2+</sup> (b) Fe<sup>3+</sup> ions (10 μL in each aliquot from 1 mM stock solution in water in each case) (c) Concentration dependent absorption at 270 nm from (a) and 315 nm from (b).
- Figure S6 (a) UV-visible titration of solution of 2,6-H<sub>2</sub>pdc (3.32 μM, mL, in DMF) upon addition of 10-80 μL of solution of Cd<sup>2+</sup> ions (1mM in water) insignificant changes were observed, followed by addition of 10-80 μL Fe<sup>3+</sup> ions (1mM in water) caused initial increase at nm 270 nm, 315 nm and 450 nm and then the peak at 450 shifting to 480 nm;; (b) Same experiment by reversing the addition of the ions showing increase in absorption at 315 nm and at 380 nm with Fe<sup>3+</sup> concentration, whereas upon addition of Cd<sup>2+</sup> ions the intensity of the peak at 480 nm disappeared.
- Figure S7 UV-visible titrations of (a) Naphydrazide, (b) 2,6-H<sub>2</sub>pdc, (c) mixture of Naphydrazide and 2,6-H<sub>2</sub>pdc, with each addition of 10 μL solution of Cd<sup>2+</sup> ions (In each case the 3.32 μM of the respective compound in DMF solution; 1 mM Cd<sup>2+</sup> ions in water).

- Figure S8 UV-visible titration of (a) Naphydrazide (3 mL) and 2,6-H<sub>2</sub>pdc (0.8 mL) (taken together from respective 3.32 μM stock solution in DMF) with each aliquot addition of Zn<sup>2+</sup> ions followed by addition of (a) Fe<sup>3+</sup> ions and (b) Fe<sup>3+</sup> ions (c) Plots of increase in the absorbance at 270 nm of a solution of the above solutions. (d) UV-visible titration of Naphydrazide (3 mL) and 2,6-H<sub>2</sub>pdc (0.8 mL) (taken together from respective 3.32 μM stock solution in DMF) with different aliquots of solution of Cd<sup>2+</sup> ions followed by (d) Fe<sup>3+</sup> ions and (e) Fe<sup>2+</sup> ions; (e) The plots of absorbances at 270 nm against concentration of ions from the figures (d) and (e).
- Figure S9 Fluorescence excitation (i) and emission spectra (ii) of (a) Naphydrazide ( $\lambda_{\text{ex}} = 335 \text{ nm}$ ,  $\lambda_{\text{em}} = 396 \text{ nm}$ ) (b) Binaphydrazide ( $\lambda_{\text{ex}} = 378 \text{ nm}$ ,  $\lambda_{\text{em}} = 558 \text{ nm}$ ) in DMF (3mL of 2mM solution of receptor in each case).
- Figure S10 Fluorescence emission titration by adding 100 μL, 20 mM Cd<sup>2+</sup> solution followed by addition of aliquots of 100 μL, 20 mM Cd<sup>2+</sup> solution to (i) Naphydrazide (2mM, 2500 μL DMF) and 2,6-H<sub>2</sub>pdc (20 mM, 400 μL DMF) solution, (ii) Naphydrazide (2mM, 2500 μL DMF) and 2,6-H<sub>2</sub>pdc (10 mM, 400 μL DMF) solution  $\lambda_{\text{em}} = 383 \text{ nm}$
- Figure S11 Fluorescence spectroscopic titration a solution of Naphydrazide (2.5 ml, 2mM) and 2,6-H<sub>2</sub>pdc (20 mM, 400 μL) ( $\lambda_{\text{ex}} = 335 \text{ nm}$ ,  $\lambda_{\text{em}} = 383 \text{ nm}$ ) upon each time addition of solution of Cd<sup>2+</sup> ions (50 μL of 20mM in water) and (b) changes with time after the addition of 400 μL of 20 mM Cd<sup>2+</sup> ion solution .
- Figure S12 Fluorescence turn-on observed in DMF solution of Naphydrazide (2 mM, 2.5 mL) together with 2,6-H<sub>2</sub>pdc (20 mM, 400 μL) after addition of solution of Cd<sup>2+</sup> ions in the presence of (a) NH<sub>4</sub><sup>+</sup>, (b) Na<sup>+</sup>, (c) K<sup>+</sup>, (d) Li<sup>+</sup>, (e) Cs<sup>+</sup>, (f) Mg<sup>2+</sup>, (g) Al<sup>3+</sup>, (h) Ag<sup>+</sup>, (i) Fe<sup>2+</sup>, (j) Sn<sup>2+</sup> ions ( in each case 400 μL of 20 mM Cd<sup>2+</sup> with 400 μL of 20 mM another ion).
- Figure S13 Comparative fluorescence turn-on observed in DMF solution of Naphydrazide (2.5 mL, 2 mM) alone and in the presence of 2,6-H<sub>2</sub>pdc (20 mM, 400 μL), Fe<sup>2+</sup> and Cd<sup>2+</sup> ions (metal ions, 20 mM solution water).
- Figure S14 Plot of fluorescence intensity with increasing concentrations at 400 nm of a solution of Naphydrazide (2.5 mL, 2 mM) and 2,6-H<sub>2</sub>pdc (20 mM, 400μL) upon addition of Cd<sup>2+</sup> ions.
- Figure S15 Fluorescence emission titration by adding 400 μL 20 mM Fe<sup>2+</sup> followed by addition of 100 μL, 20 mM Cd<sup>2+</sup> solution in each aliquot to (a) Naphydrazide (2mM, 2500 μL DMF) and 2,6-H<sub>2</sub>pdc (10 mM, 400 μL DMF) and (b) Naphydrazide (2mM, 2500 μL DMF) and 2,6-H<sub>2</sub>pdc (20 mM, 400 μL DMF)
- Figure S16 Fluorescence decay profile of a bi-component solution of Naphydrizide and 2,6-H<sub>2</sub>pdc with Cd<sup>2+</sup> ions (violet line) and with Cd<sup>2+</sup> and Fe<sup>2+</sup> (blue line).

|            |                                                                                                                                                                                                                                                                                                               |
|------------|---------------------------------------------------------------------------------------------------------------------------------------------------------------------------------------------------------------------------------------------------------------------------------------------------------------|
| Figure S17 | Experimental and Simulated stacking powder XRD pattern of (i) [(HNaphydrazide)[Fe(2,6-pdc) <sub>2</sub> ] $\cdot$ H <sub>2</sub> O (ii) [(H <sub>2</sub> Binaphydrazide)[Fe(2,6-pdc) <sub>2</sub> ] <sub>2</sub> $\cdot$ 4.5H <sub>2</sub> O.                                                                 |
| Figure S18 | Optical microscopic images of the complex (a) [(HNaphydrazide)[Fe(2,6-pdc) <sub>2</sub> ] $\cdot$ H <sub>2</sub> O and (b) [(H <sub>2</sub> Binaphydrazide)[Fe(2,6-pdc) <sub>2</sub> ] <sub>2</sub> $\cdot$ 4.5H <sub>2</sub> O.                                                                              |
| Figure S19 | FTIR spectra powder samples of complex (a) [(HNaphydrazide)[Fe(2,6-pdc) <sub>2</sub> ] $\cdot$ H <sub>2</sub> O and (b) [(H <sub>2</sub> Binaphydrazide)[Fe(,6-pdc) <sub>2</sub> ] <sub>2</sub> $\cdot$ 4.5H <sub>2</sub> O.                                                                                  |
| Figure S20 | Thermogram of the complex (a) [(HNaphydrazide)[Fe(2,6-pdc) <sub>2</sub> ] $\cdot$ H <sub>2</sub> O, and (b) [(H <sub>2</sub> Binaphydrazide)[Fe(2,6-pdc) <sub>2</sub> ] <sub>2</sub> $\cdot$ 4.5H <sub>2</sub> O in argon environment with heating rate 10 $^{\circ}$ C/min.                                  |
| Figure S21 | UV-visible spectra of the (a) [(HNaphydrazide)[Fe(2,6-pdc) <sub>2</sub> ] $\cdot$ H <sub>2</sub> O and (b) [(H <sub>2</sub> Binaphydridize)[Fe(2,6-pdc) <sub>2</sub> ] <sub>2</sub> $\cdot$ 4.5H <sub>2</sub> O (solution in different concentrations in DMF).                                                |
| Figure S22 | Cyclic-voltamogram of the (a) Naphydrazide and (b) Binaphydrazide (solution in DMF with scan rate of 50 mVs <sup>-1</sup> )                                                                                                                                                                                   |
| Figure S23 | Cyclic-voltamogram of the compounds (a) [(HNaphydrazide)[Fe(2,6-pdc) <sub>2</sub> ] $\cdot$ H <sub>2</sub> O and (b) [(H <sub>2</sub> Binaphydridize)[Fe(2,6-pdc) <sub>2</sub> ] <sub>2</sub> $\cdot$ 4.5H <sub>2</sub> O in DMF (scan rate of 50 mVs <sup>-1</sup> ).                                        |
| Figure S24 | Cyclic-voltamometric titrations of solution of (a) Naphydrazide in DMF (1 mM) with each addition of 100 $\mu$ L solution of Fe <sup>2+</sup> ions (1 mM In water) (b) Naphydrazide (31 mM in DMF) solution with each time addition of 100 $\mu$ L solution of Cd <sup>2+</sup> ions (1 mM in water).          |
| Figure S25 | Cyclic-voltametric titration of Naphydrazide and 2,6-H <sub>2</sub> pdc (1mM, 10 mL of each) in DMF to which solution of Fe <sup>2+</sup> ions was added (100 $\mu$ L solution in different aliquots from a 1 mM solution of the corresponding stock solution of the metal ion).                              |
| Figure S26 | Plots of the changes in the intensity of absorptions of solutions of (a) Naphydrazide and 2,6-H <sub>2</sub> pdc concentration (b) 2,6-H <sub>2</sub> pdc and (c) Naphhydrazide upon addition of Fe <sup>3+</sup> (Used for determining limit of detections).                                                 |
| Table S1   | The E <sub>pc</sub> , E <sub>pa</sub> and E <sub>1/2</sub> values observed in cyclic-voltamogram                                                                                                                                                                                                              |
| Table S2   | Metal-ligand bond-angles and bond distances in the two complexes.                                                                                                                                                                                                                                             |
| Table S3   | Selected examples of receptors used in the detection of Fe <sup>2+</sup> and Fe <sup>3+</sup> ions and detection limits.                                                                                                                                                                                      |
| TableS4    | Selected examples of receptors used in detection of Cd <sup>2+</sup> ions and detection limits.                                                                                                                                                                                                               |
| Table S5   | Evaluation of standard deviation in the detection of cadmium ions by observing fluorescence intensity at 400 nm of a solution of Naphydrazide (2 mM, 2.5 mL) together with 2,6-H <sub>2</sub> pdc (20 mM, 400 $\mu$ L) after incremental addition of 20 mM Cd <sup>2+</sup> from two independent experiments. |

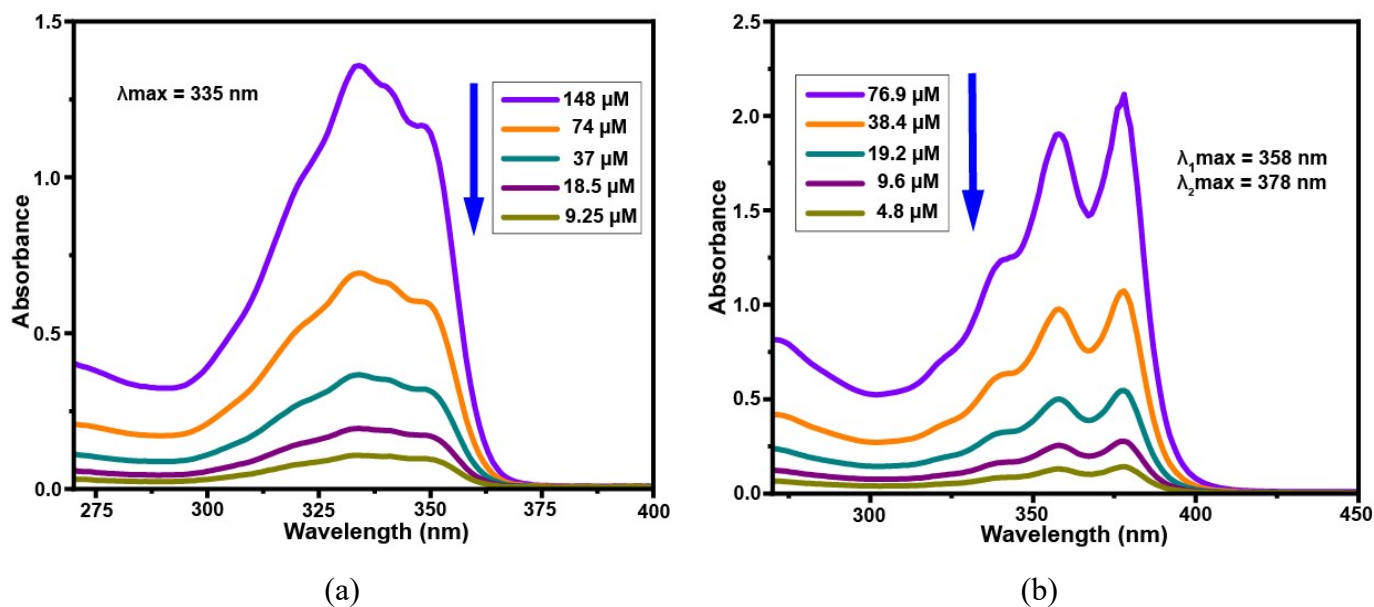

Figure S1: Concentration dependent UV-visible spectra of the (a) Naphthylidenehydrazide and (b) Binaphthylidenehydrazide in DMF showing a decrease in absorptions upon dilution.

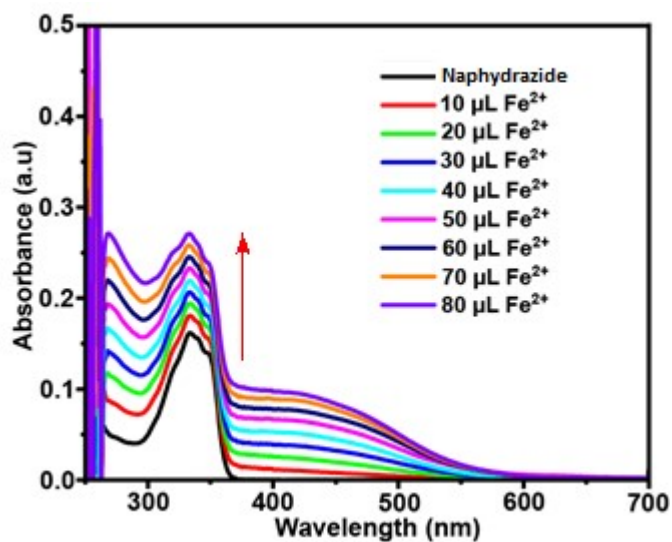

Figure S2: UV-visible titration of Naphthylidenehydrazide (3.32  $\mu\text{M}$ , in DMF) showing increase in the absorbance at 335 nm upon addition of  $\text{Fe}^{2+}$  ions (each time addition of 10  $\mu\text{L}$  solution of 1 mM ferrous acetate in water).

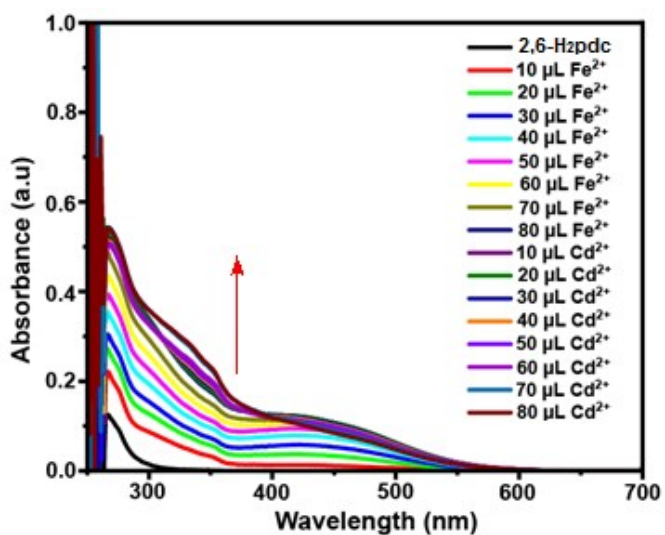

(a)

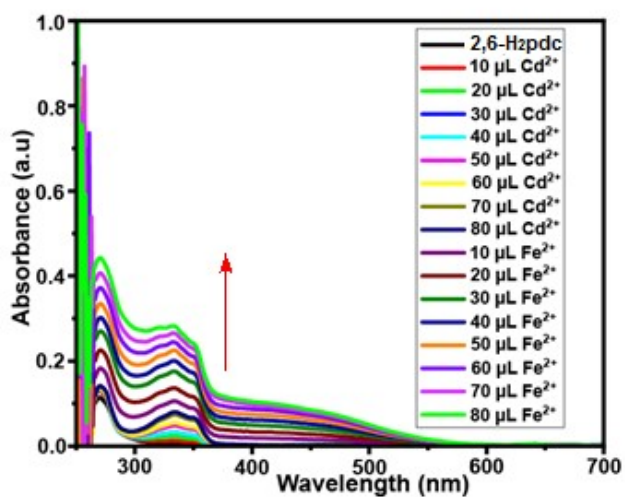

(b)

Figure S3: (a) UV-visible titration of solution of 2,6-H<sub>2</sub>pdc (3.32 μM, 3 mL in DMF) showing increase in absorbance at 270 nm upon addition of 10-80 μL Fe<sup>2+</sup> ions (1mM in water) and then addition of 10-80 μL of solution of Cd<sup>2+</sup> ions (1 mM in water); (b) Same experiment by reversing the addition of the ions.

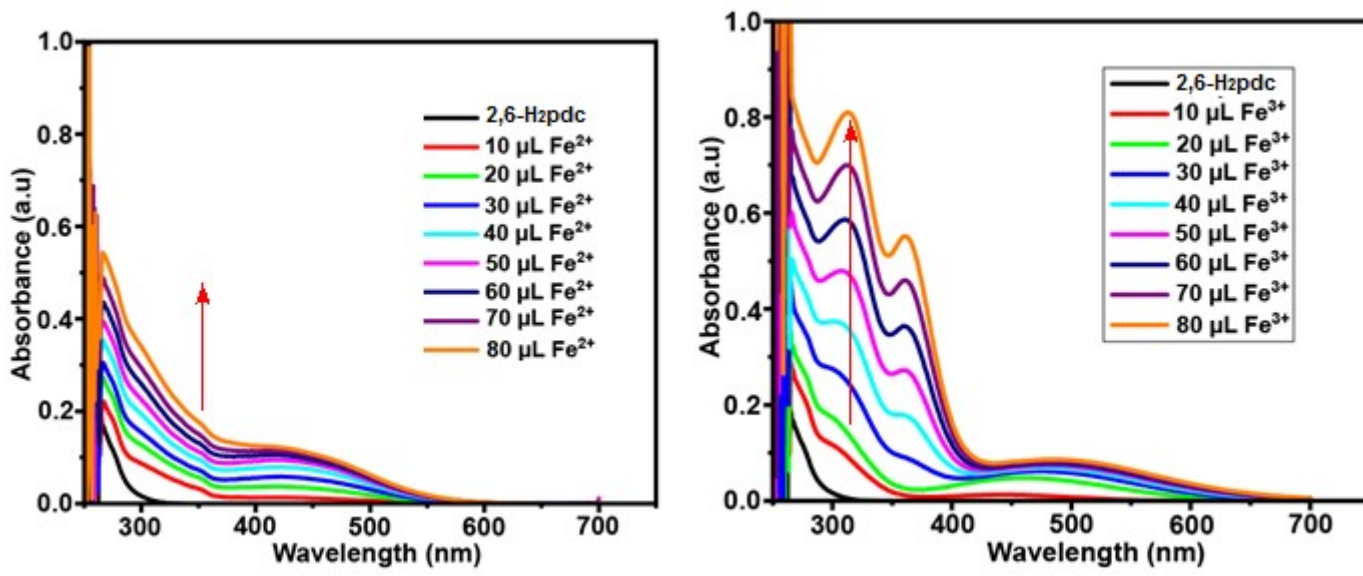

(a)

(b)

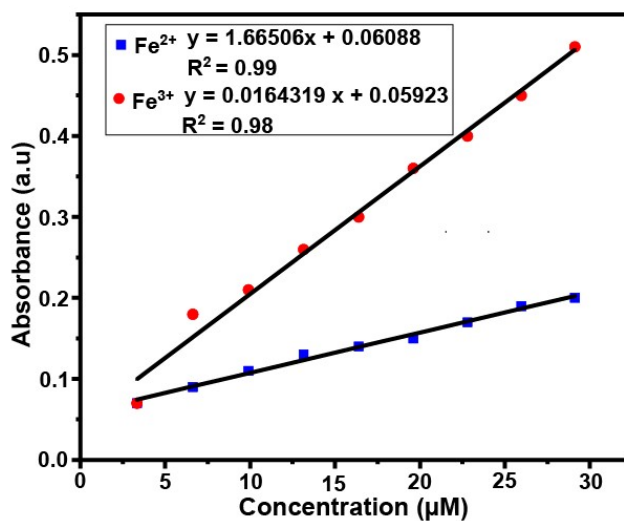

(c)

Figure S4: UV-visible titration of 2,6-H<sub>2</sub>pdc (3.32 μM in DMF) solution with each time addition of 10 μL solution of 1 mM (a) Fe<sup>2+</sup> (b) Fe<sup>3+</sup> ions. (c) is the plot of concentration vs absorbance at 270 nm for Fe<sup>2+</sup> and at 315 nm for Fe<sup>3+</sup> of the figures (a) and (b).

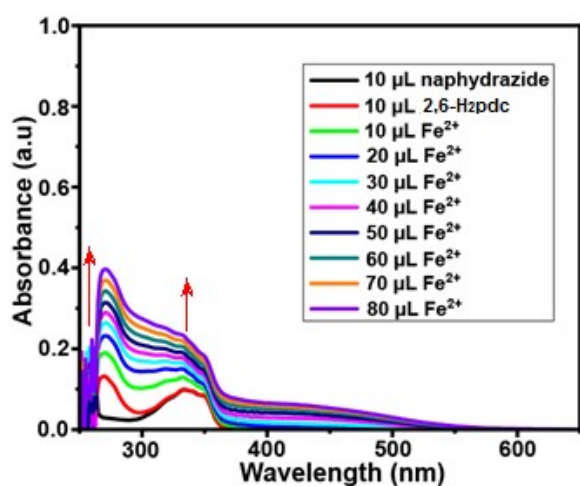

(a)

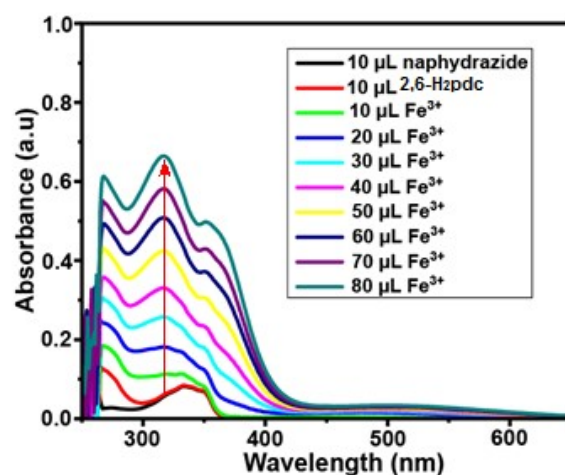

(b)

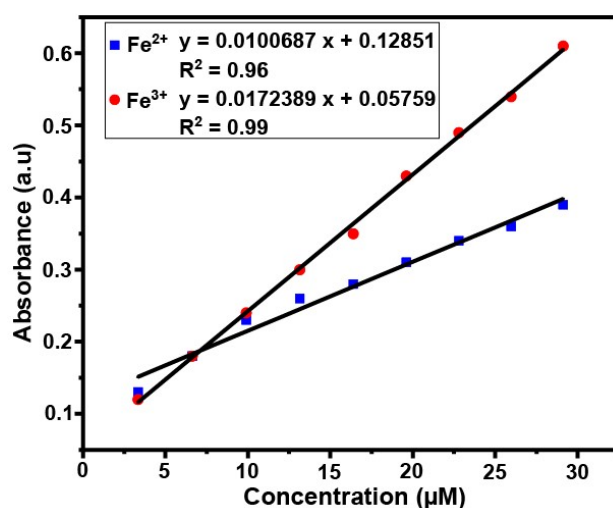

(c)

Figure S5: UV-visible titrations of a solution of Naphthylidrazide together with 2,6-H<sub>2</sub>pdc (both 10 μL from 3.32 μM stock solution in DMF added to 2mL DMF ) upon addition of (a) Fe<sup>2+</sup> (b) Fe<sup>3+</sup> ions (10 μL in each aliquot from 1 mM stock solution in water in each case) (c) Concentration dependent absorption at 270 nm from (a) and 315 nm from (b).

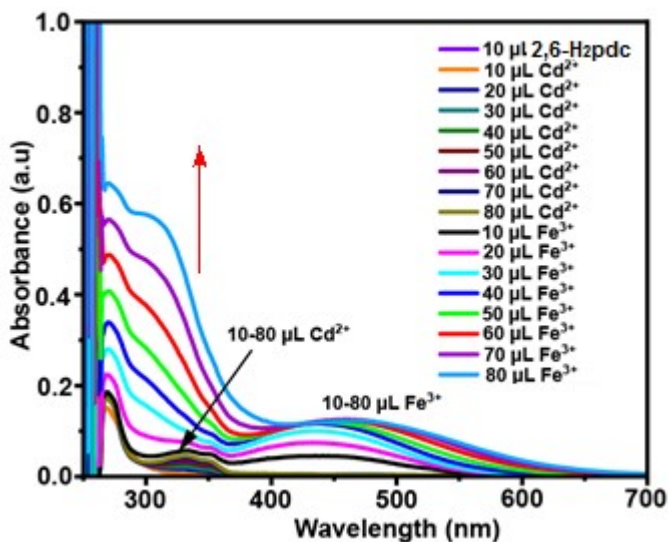

(a)

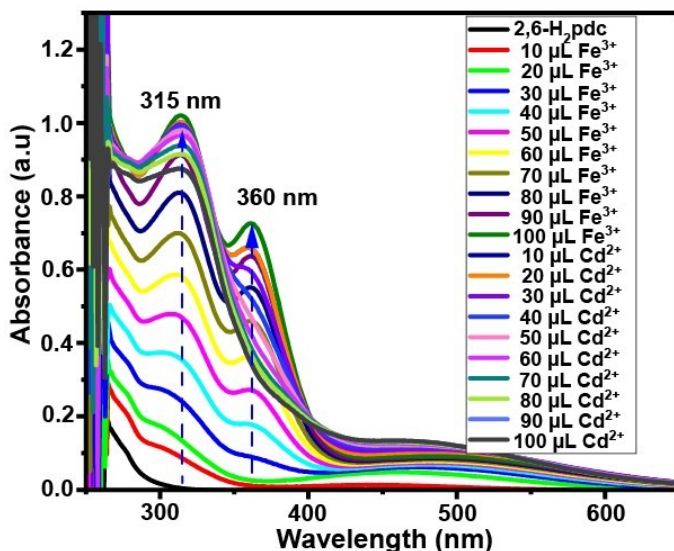

(b)

Figure S6: (a) UV-visible titration of solution of 2,6-H<sub>2</sub>pdc (3.32 μM, mL, in DMF) upon addition of 10-80 μL of solution of Cd<sup>2+</sup> ions (1mM in water) insignificant changes were observed, followed by addition of 10-80 μL Fe<sup>3+</sup> ions (1mM in water) caused initial increase at 270 nm, 315 nm and 450 nm and then the peak at 450 shifting to 480 nm;; (b) Same experiment by reversing the addition of the ions showing increase in absorption at 315 nm and at 360 nm with Fe<sup>3+</sup> concentration, whereas upon addition of Cd<sup>2+</sup> ions the intensity of the peak at 360 nm disappeared.

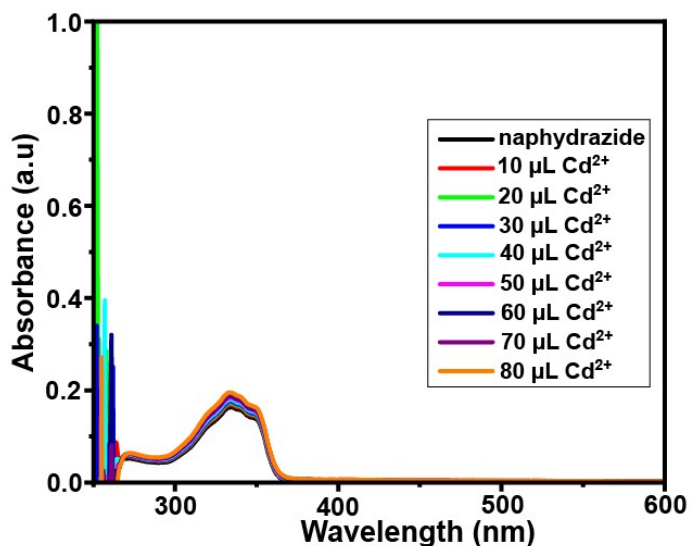

(a)

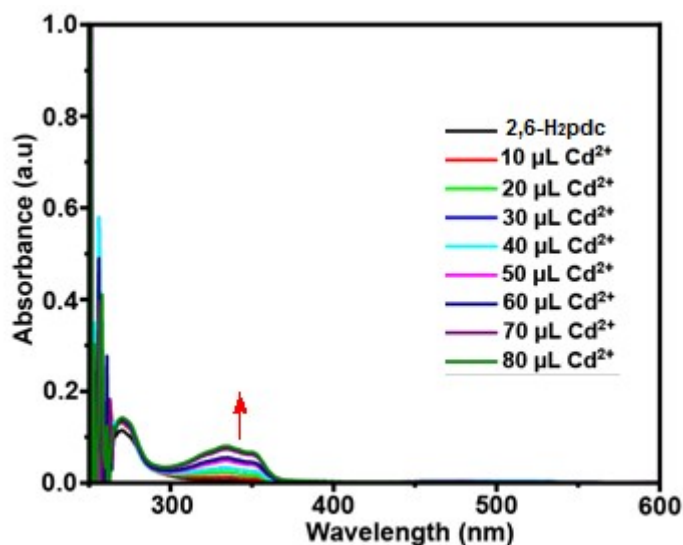

(b)



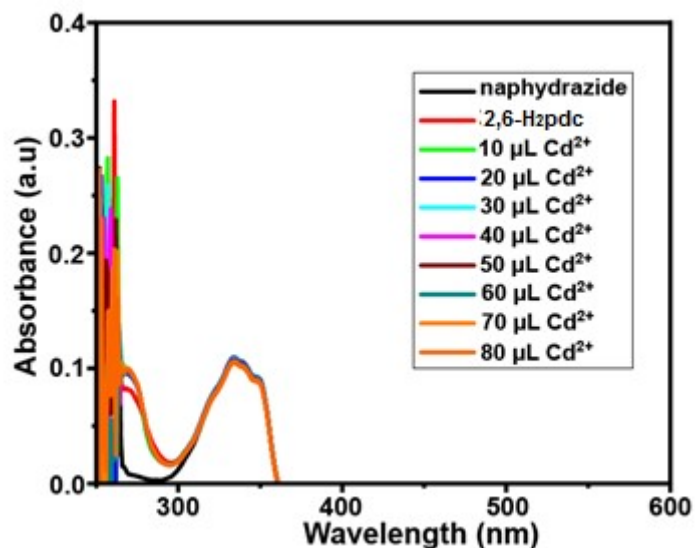

(c)

Figure S7: UV-visible titrations of (a) Naphthylidene-2-thiobarbituric acid, (b) 2,6-H<sub>2</sub>pdc, (c) mixture of Naphthylidene-2-thiobarbituric acid and 2,6-H<sub>2</sub>pdc, with each addition of 10 μL solution of Cd<sup>2+</sup> ions (In each case the 3.32 μM of the respective compound in DMF solution; 1 mM Cd<sup>2+</sup> ions in water).

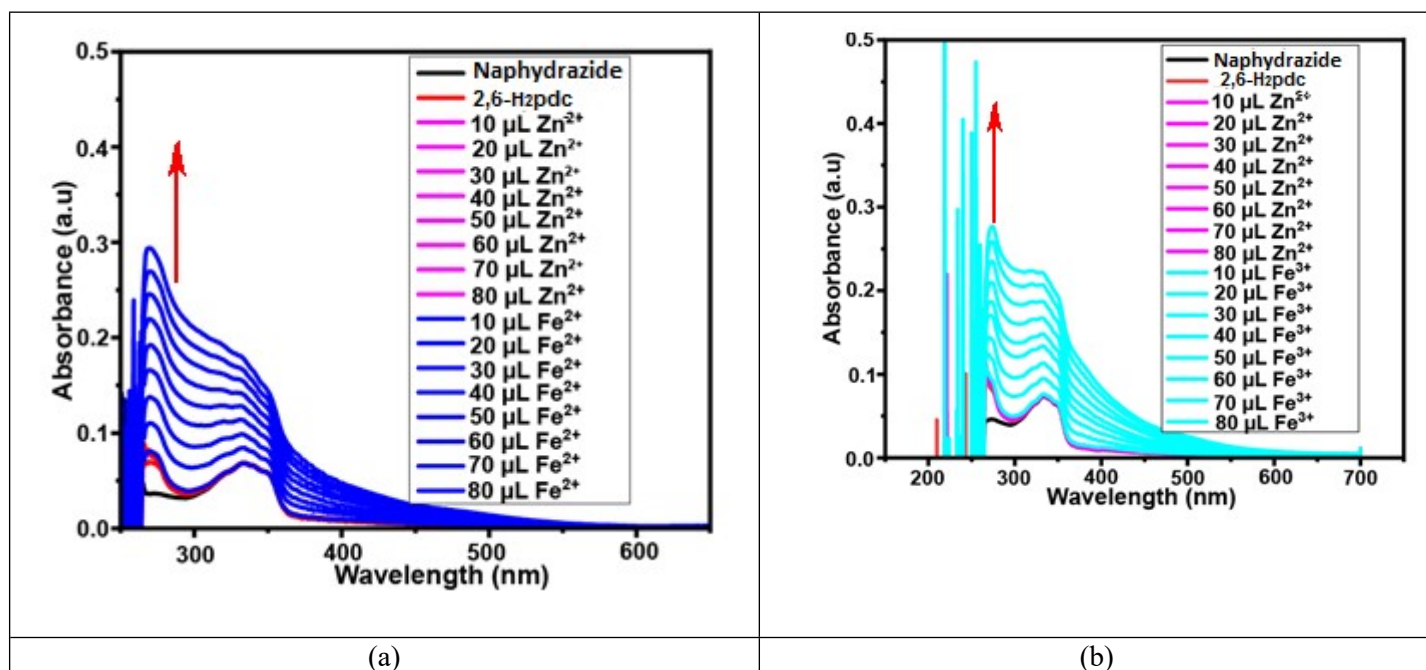

(a)

(b)

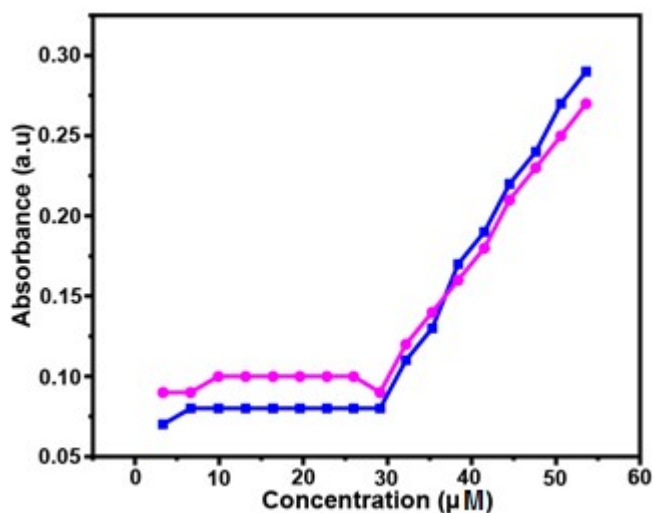

(c)

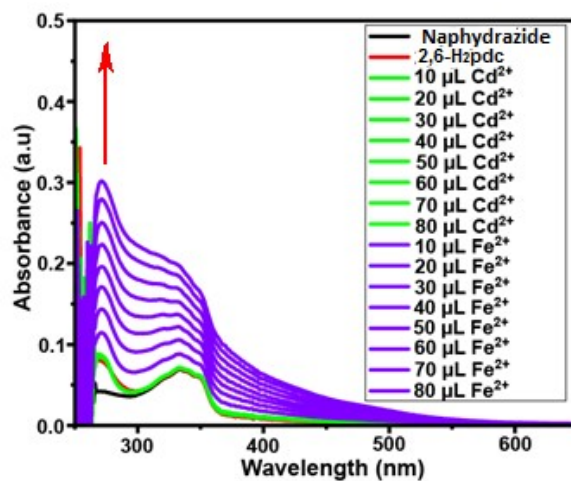

(d)

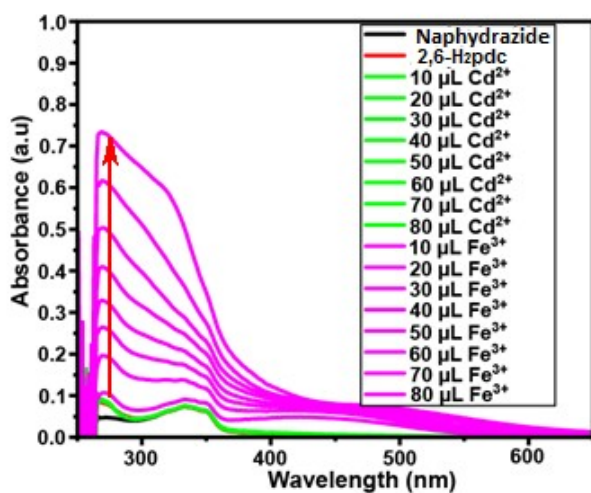

(e)

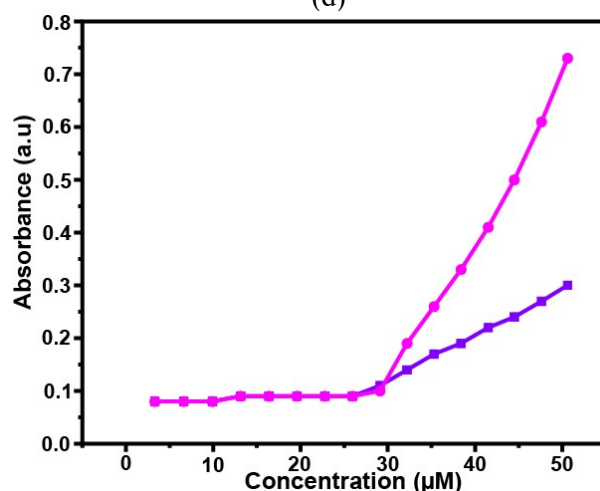

(f)

Figure S8: UV-visible titration of (a) Naphthylazide (3 mL) and 2,6-H<sub>2</sub>pdc (0.8 mL) (taken together from respective 3.32 μM stock solution in DMF) with each aliquot addition of Zn<sup>2+</sup> ions followed by addition of (a) Fe<sup>3+</sup> ions and (b) Fe<sup>3+</sup> ions (c) Plots of increase in the absorbance at 270 nm of a solution of the above solutions. (d) UV-visible titration of Naphthylazide (3 mL) and 2,6-H<sub>2</sub>pdc (0.8 mL) (taken together from respective 3.32 μM stock solution in DMF) with different aliquots of solution of Cd<sup>2+</sup> ions followed by (d) Fe<sup>3+</sup> ions and (e) Fe<sup>2+</sup> ions; (e) The plots of absorbances at 270 nm against concentration of ions from the figures (d) and (e).

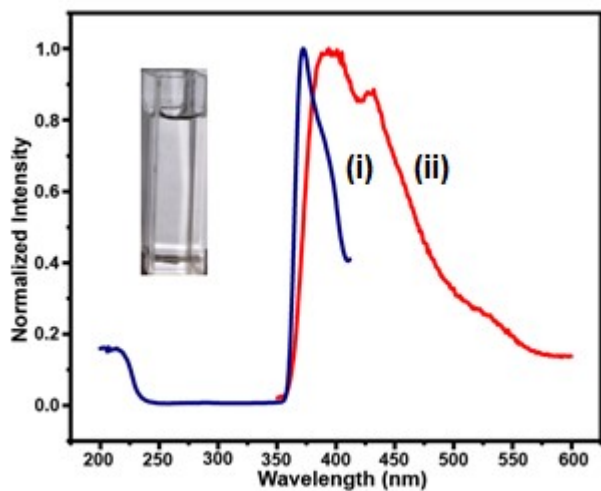

(a)

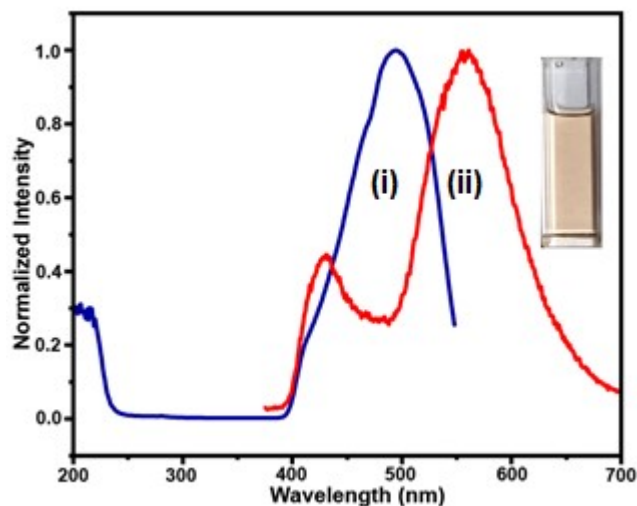

(b)

Figure S9: Fluorescence excitation (i) and emission spectra (ii) of (a) Naphydrazide ( $\lambda_{\text{ex}} = 335 \text{ nm}$ ,  $\lambda_{\text{em}} = 396 \text{ nm}$ ) (b) Binaphydrazide ( $\lambda_{\text{ex}} = 378 \text{ nm}$ ,  $\lambda_{\text{em}} = 558 \text{ nm}$ ) in DMF (3mL of 2mM solution of receptor in each case).

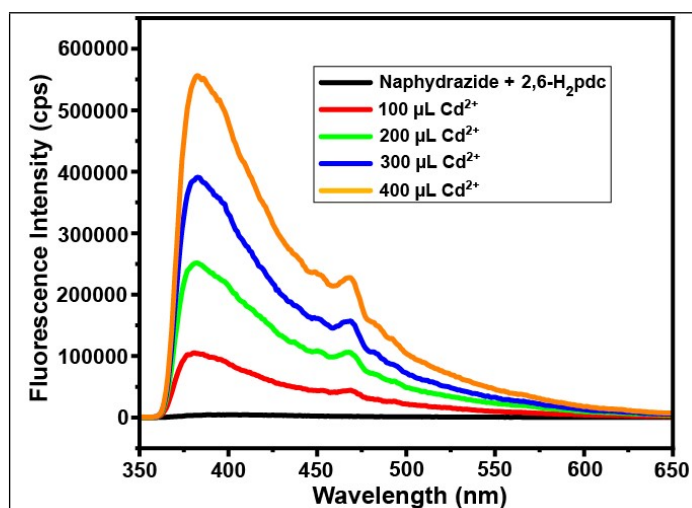

(i)

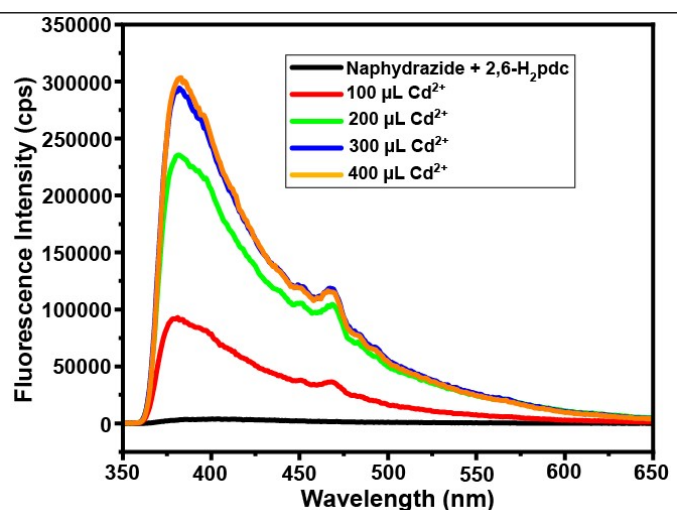

(ii)

Figure S10: Fluorescence emission titration by adding 100  $\mu\text{L}$ , 20 mM  $\text{Cd}^{2+}$  solution followed by addition of aliquots of 100  $\mu\text{L}$ , 20 mM  $\text{Cd}^{2+}$  solution to (i) Naphydrazide (2mM, 2500  $\mu\text{L}$  DMF) and 2,6- $\text{H}_2\text{pdc}$  (20 mM, 400  $\mu\text{L}$  DMF) solution, (ii) Naphydrazide (2mM, 2500  $\mu\text{L}$  DMF) and 2,6- $\text{H}_2\text{pdc}$  (10 mM, 400  $\mu\text{L}$  DMF) solution  $\lambda_{\text{em}} = 383 \text{ nm}$ )

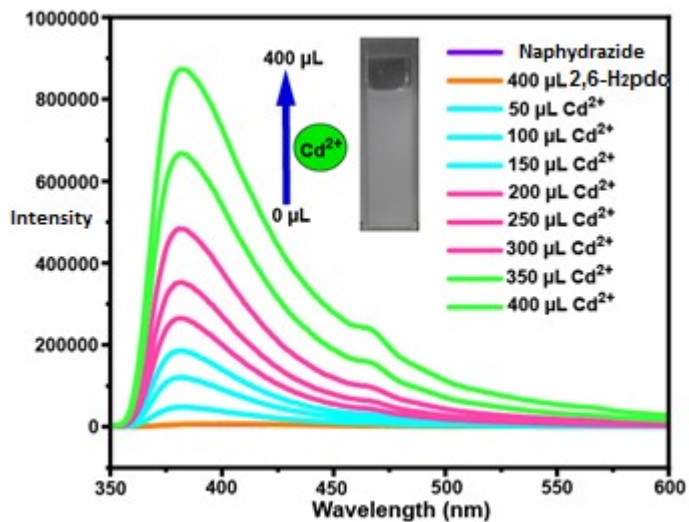

(a)

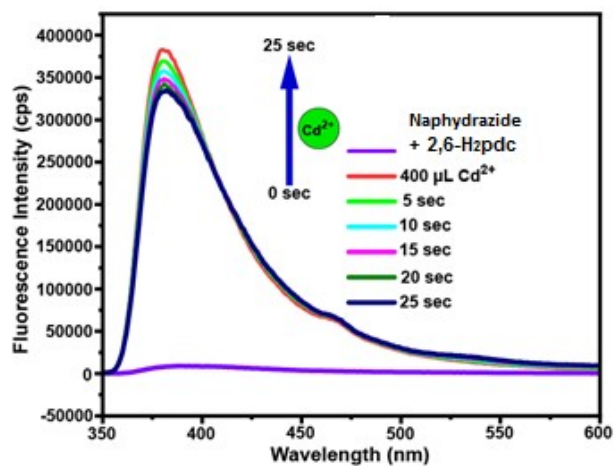

(b)

Figure S11: Fluorescence spectroscopic titration a solution of Naphthylidene-Naphthylamine (2.5 ml, 2mM) and 2,6-H<sub>2</sub>pdc (20 mM, 400 μL) ( $\lambda_{\text{ex}} = 335 \text{ nm}$ ,  $\lambda_{\text{em}} = 383 \text{ nm}$ ) upon each time addition of solution of Cd<sup>2+</sup> ions (50 μL of 20mM in water) and (b) changes with time after the addition of 400 μL of 20 mM Cd<sup>2+</sup> ion solution .

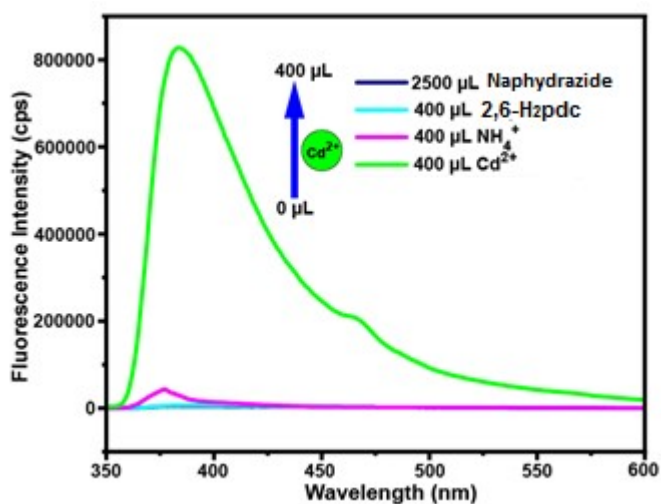

(a)

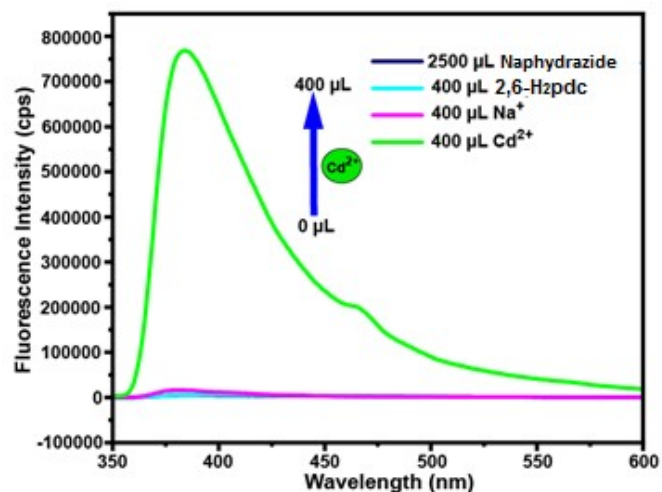

(b)

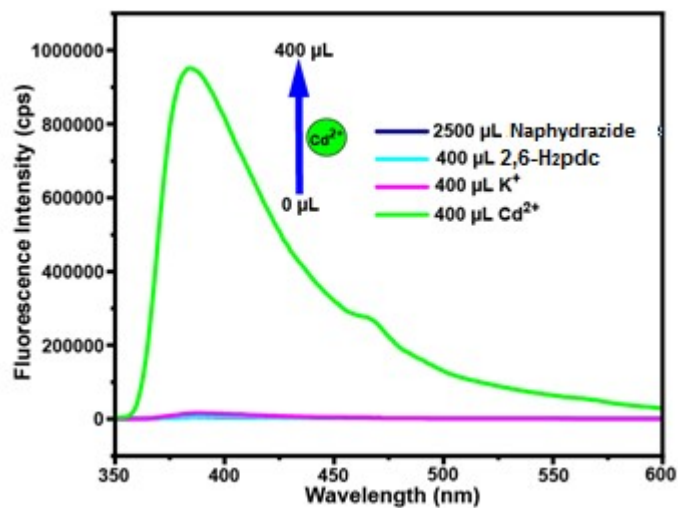

(c)

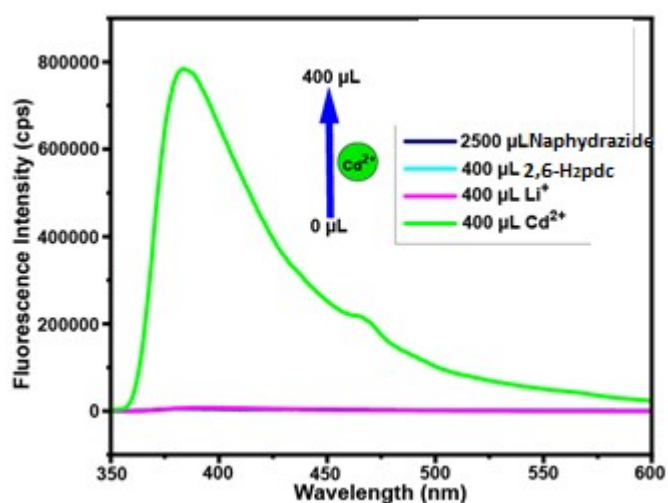

(d)

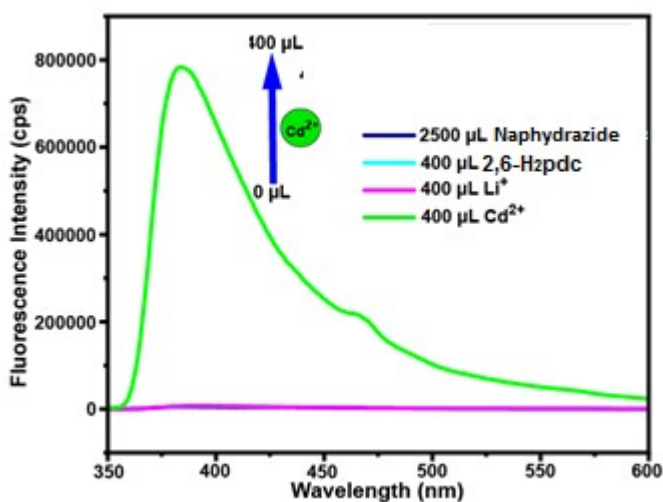

(e)

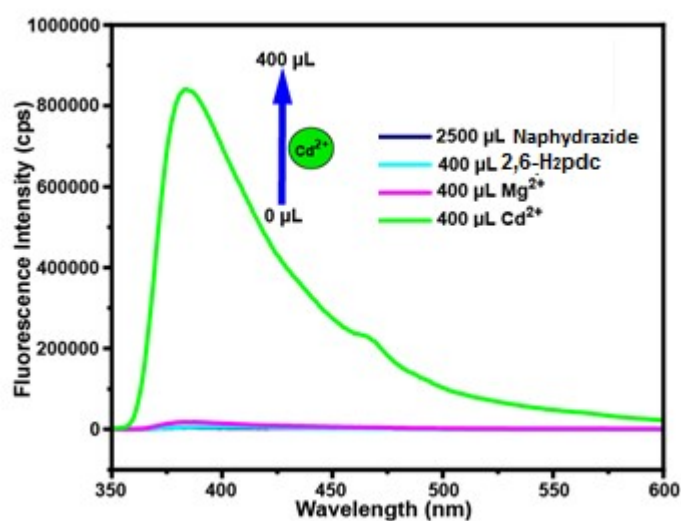

(f)

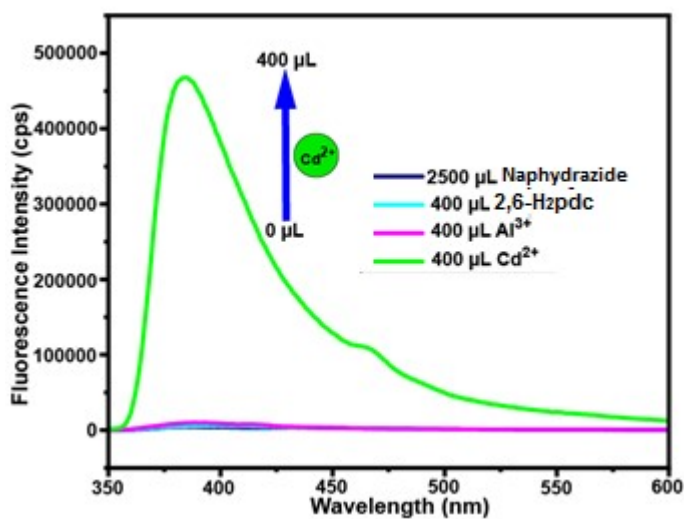

(g)

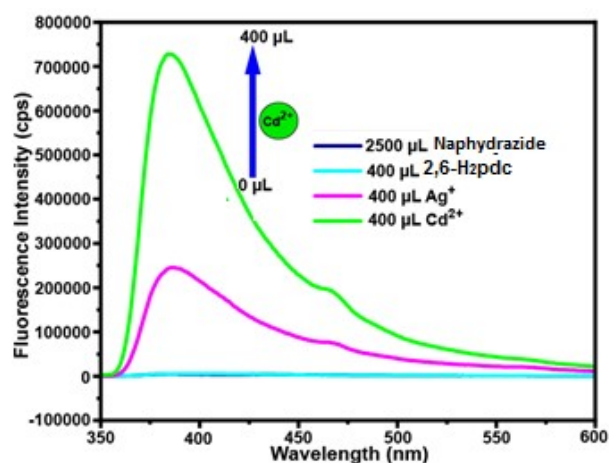

(h)

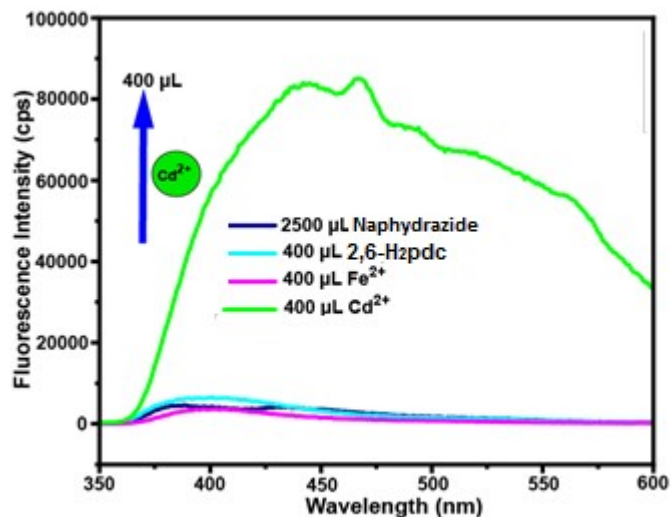

(i)

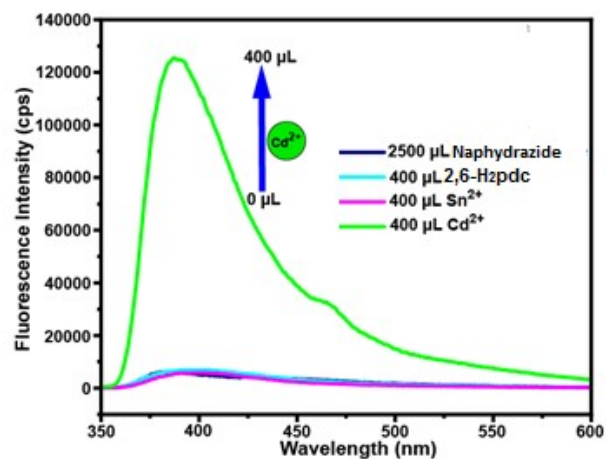

(j)

Figure S12: Fluorescence turn-on observed in DMF solution of Naphydrazide (2 mM, 2.5 mL) together with 2,6-H<sub>2</sub>pdc (20 mM, 400  $\mu\text{L}$ ) after addition of solution of Cd<sup>2+</sup> ions in the presence of (a) NH<sub>4</sub><sup>+</sup>, (b) Na<sup>+</sup>, (c) K<sup>+</sup>, (d) Li<sup>+</sup>, (e) Cs<sup>+</sup>, (f) Mg<sup>2+</sup>, (g) Al<sup>3+</sup>, (h) Ag<sup>+</sup>, (i) Fe<sup>2+</sup>, (j) Sn<sup>2+</sup> ions (in each case 400  $\mu\text{L}$  of 20 mM Cd<sup>2+</sup> with 400  $\mu\text{L}$  of 20 mM another ion).

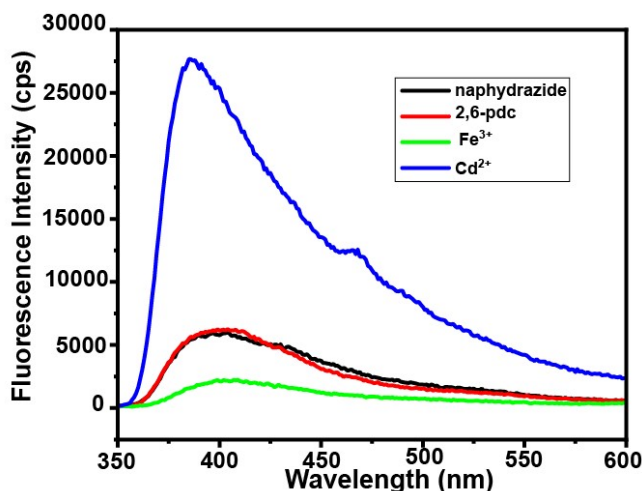

Figure S13: Comparative fluorescence turn-on observed in DMF solution of Naphydrazide (2.5 mL, 2 mM) alone and in the presence of 2,6-H<sub>2</sub>pdc (20 mM, 400  $\mu\text{L}$ ), Fe<sup>2+</sup> and Cd<sup>2+</sup> ions (metal ions, 20 mM solution water).

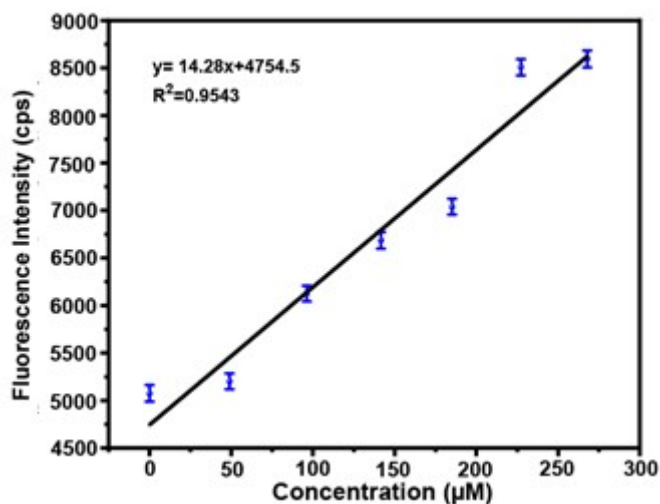

Figure S14: Plot of fluorescence intensity with increasing concentrations at 400 nm of a solution of Naphydrazide (2.5 mL, 2 mM) and 2,6-H<sub>2</sub>pdc (20 mM, 400 μL) upon addition of Cd<sup>2+</sup> ions.

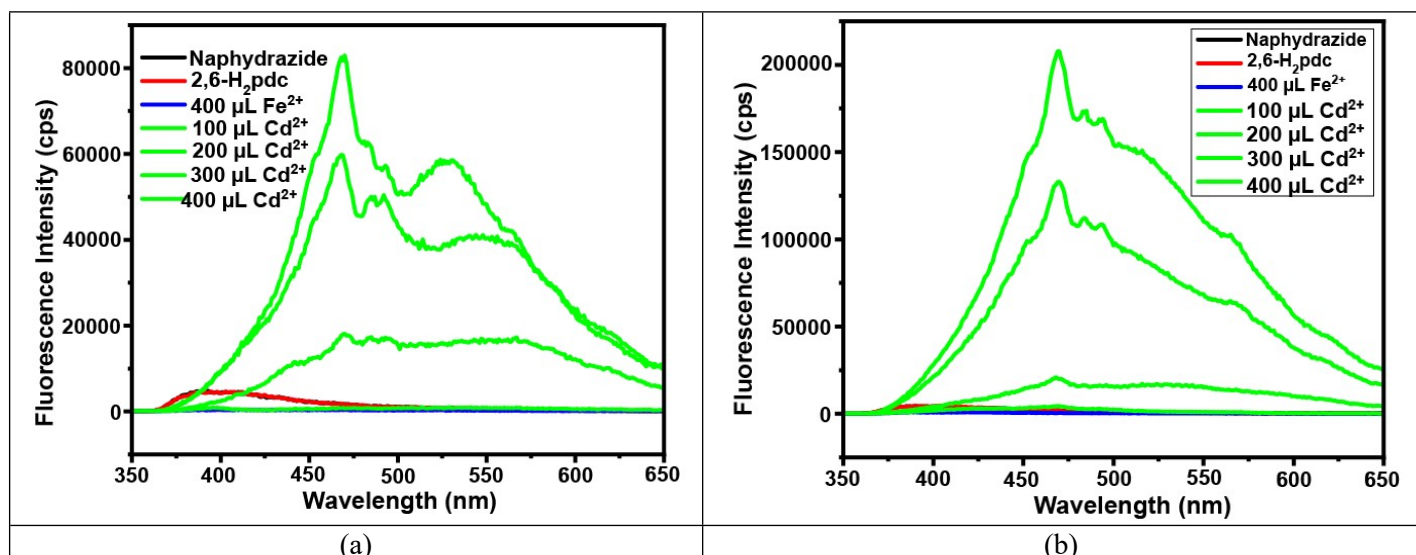

Figure S15: Fluorescence emission titration by adding 400 μL 20 mM Fe<sup>2+</sup> followed by addition of 100 μL, 20 mM Cd<sup>2+</sup> solution in each aliquot to (a) Naphydrazide (2 mM, 2500 μL DMF) and 2,6-H<sub>2</sub>pdc (10 mM, 400 μL DMF) and (b) Naphydrazide (2mM, 2500 μL DMF) and 2,6-H<sub>2</sub>pdc (20 mM, 400 μL DMF)

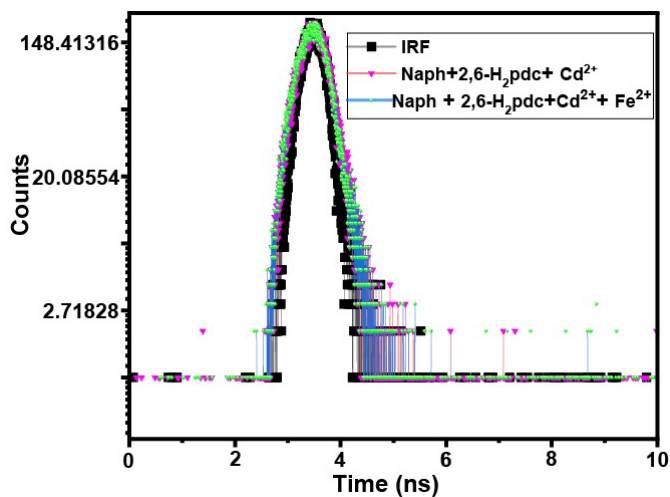

| ❖ Exponential Components Analysis (Tail Fitting) |                          |              |           |                  |               |                      | ❖ Exponential Components Analysis (Tail Fitting) |                         |              |           |                  |               |                      |
|--------------------------------------------------|--------------------------|--------------|-----------|------------------|---------------|----------------------|--------------------------------------------------|-------------------------|--------------|-----------|------------------|---------------|----------------------|
| Fitting range                                    | : [1439; 2200] channels  |              |           |                  |               |                      | Fitting range                                    | : [1404; 2200] channels |              |           |                  |               |                      |
| $\chi^2$                                         | : 1.052                  |              |           |                  |               |                      | $\chi^2$                                         | : 1.046                 |              |           |                  |               |                      |
|                                                  | $B_i$                    | $\Delta B_i$ | $f_i$ (%) | $\Delta f_i$ (%) | $\tau_i$ (ns) | $\Delta \tau_i$ (ns) |                                                  | $B_i$                   | $\Delta B_i$ | $f_i$ (%) | $\Delta f_i$ (%) | $\tau_i$ (ns) | $\Delta \tau_i$ (ns) |
| 1                                                | -158.3056                | 6.6835       | 10.424    | 0.440            | 0.050 fixed   | 0                    | 1                                                | -424.5000               | 15.0186      | 27.027    | 0.956            | 0.100 fixed   | 0                    |
| 2                                                | 301.7336                 | 3.8243       | 89.576    | 17.483           | 0.225         | 0.041                | 2                                                | 565.2792                | 12.7721      | 72.973    | 20.270           | 0.203         | 0.052                |
| Shift                                            | : 0 ns ( $\pm 0$ ns)     |              |           |                  |               |                      | Shift                                            | : 0 ns ( $\pm 0$ ns)    |              |           |                  |               |                      |
| Decay Background                                 | : -0.160 ( $\pm 0.125$ ) |              |           |                  |               |                      | Decay Background                                 | : 0.147 ( $\pm 0.124$ ) |              |           |                  |               |                      |

Figure S16 : Fluorescence decay profile of a bi-component solution of Naphydrizide and 2,6-H<sub>2</sub>pdc with Cd<sup>2+</sup> ions (violet line) and with Cd<sup>2+</sup> and Fe<sup>2+</sup> (blue line). The data for the without Fe<sup>2+</sup> is on left and right is with Fe<sup>2+</sup>.

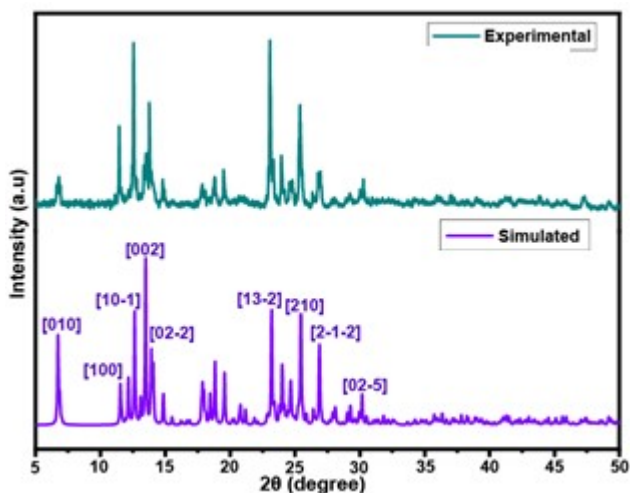

(i)

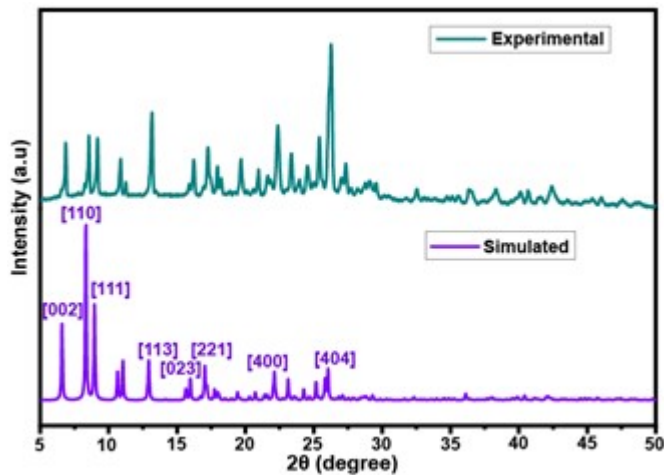

(ii)

Figure S17: Experimental and Simulated stacking powder XRD pattern of (i) [(HNaphydrizide)[Fe(2,6-pdc)<sub>2</sub>]<sub>2</sub>·H<sub>2</sub>O (ii) [(H<sub>2</sub>Binaphydrizide)[Fe(2,6-pdc)<sub>2</sub>]<sub>2</sub>·4.5H<sub>2</sub>O.



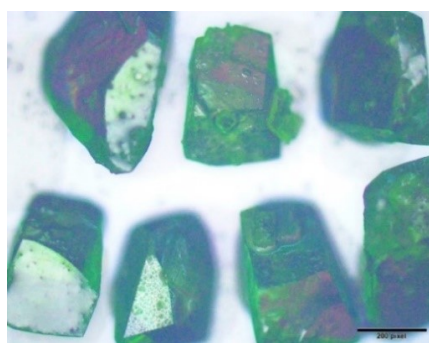

(a)

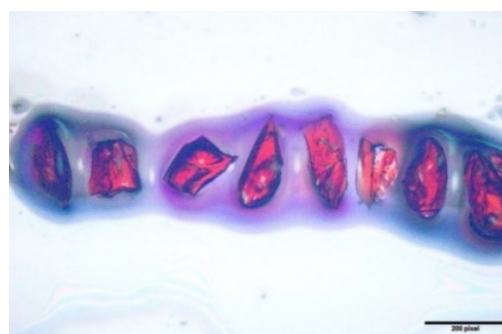

(b)

Figure S18: Optical microscopic images of the complex (a) [(HNaphhydrazide)[Fe(2,6-pdc)<sub>2</sub>]·H<sub>2</sub>O and (b) [(H<sub>2</sub>Binaphhydrazide)[Fe(2,6-pdc)<sub>2</sub>]<sub>2</sub>·4.5H<sub>2</sub>O.

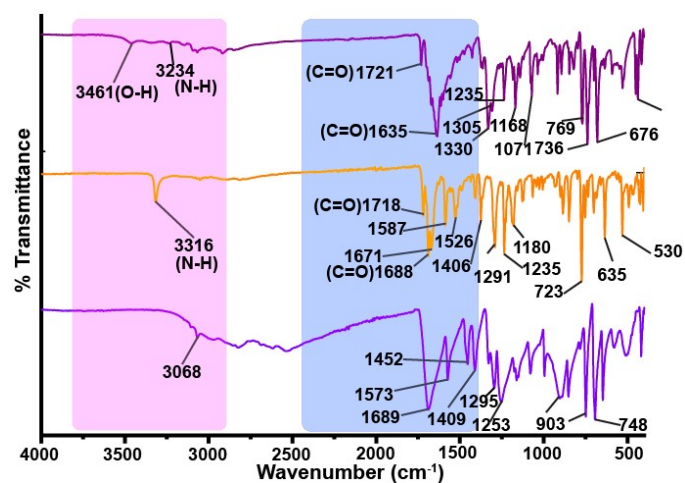

(a)

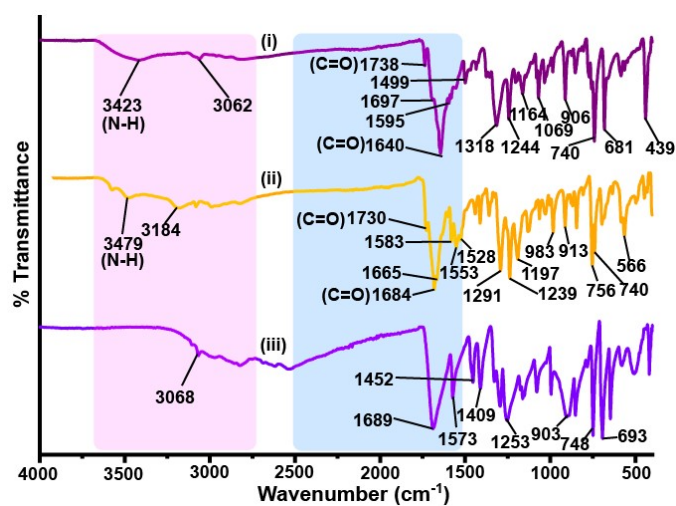

(b)

Figure S19: FTIR spectra powder samples of complex (a) [(HNaphhydrazide)[Fe(2,6-pdc)<sub>2</sub>]·H<sub>2</sub>O and (b) [(H<sub>2</sub>Binaphhydrazide)[Fe(2,6-pdc)<sub>2</sub>]<sub>2</sub>·4.5H<sub>2</sub>O.

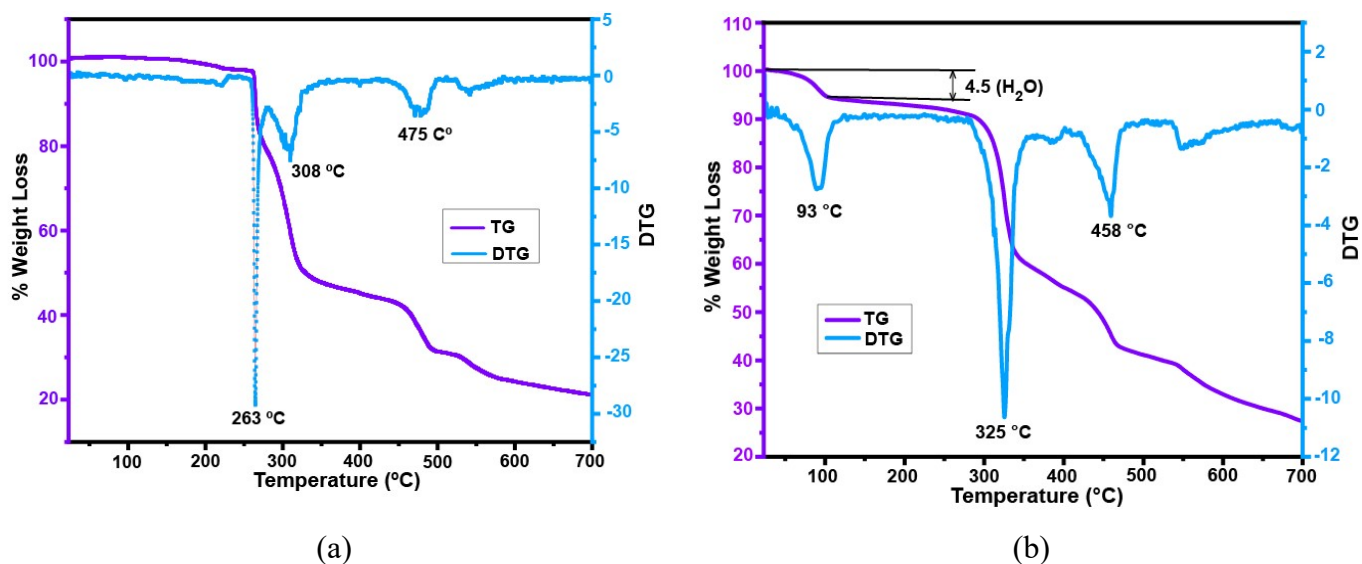

Figure S20: Thermogram of the complex (a) [(HNaphydrazide)[Fe(2,6-pdc)<sub>2</sub>] $\cdot$ H<sub>2</sub>O, and (b) [(H<sub>2</sub>Binaphydrazide)[Fe(2,6-pdc)<sub>2</sub>]<sub>2</sub>·4.5H<sub>2</sub>O in argon environment with heating rate 10 °C/min.

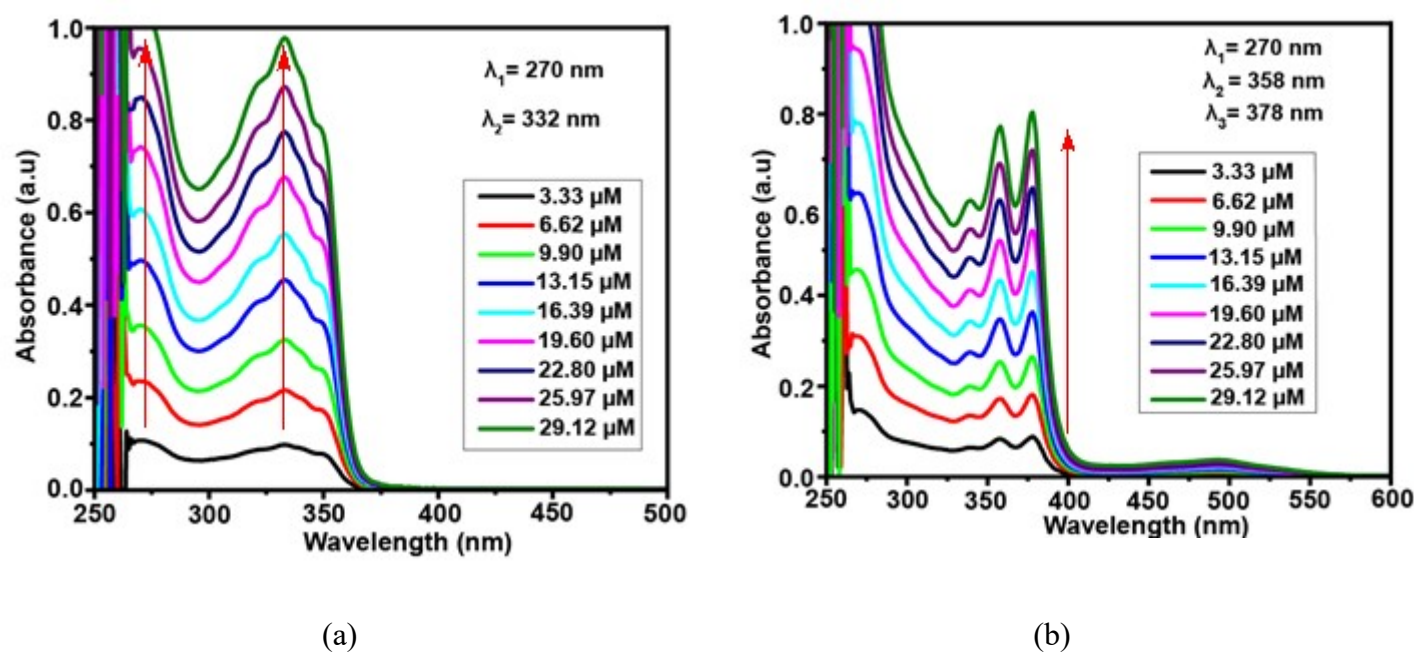

Figure S21: UV-visible spectra of the (a) [(HNaphydrazide)[Fe(2,6-pdc)<sub>2</sub>] $\cdot$ H<sub>2</sub>O and (b) [(H<sub>2</sub>Binaphydrazide)[Fe(2,6-pdc)<sub>2</sub>]<sub>2</sub>·4.5H<sub>2</sub>O (solution in different concentrations in DMF).

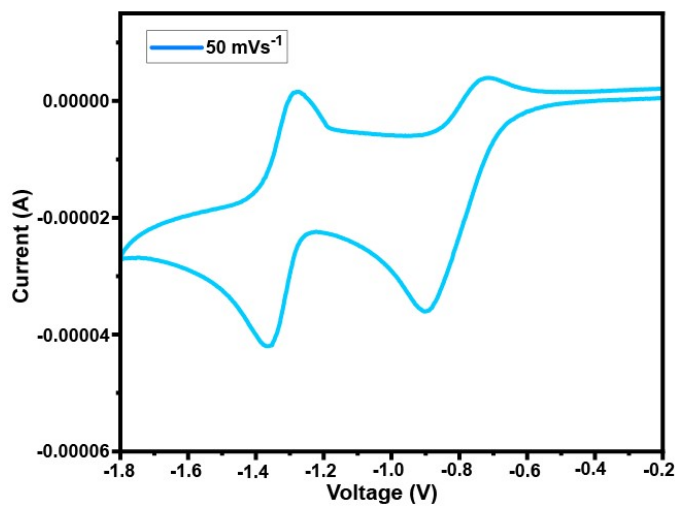

(a)

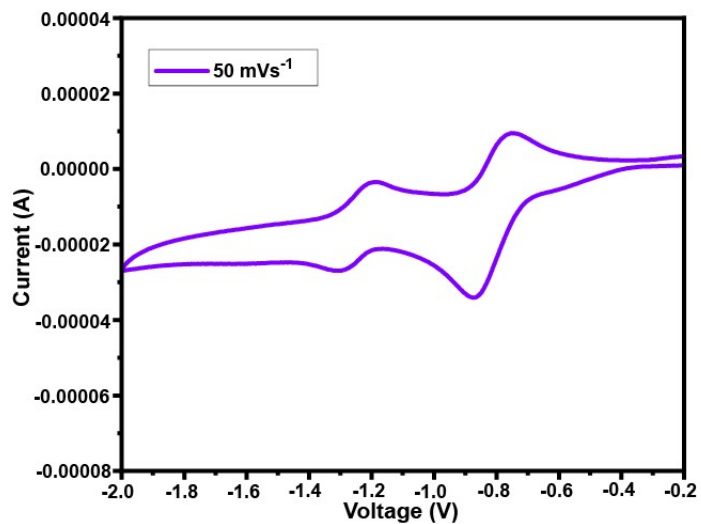

(b)

Figure S22: Cyclic-voltammogram of the (a) Naphthylhydrazide and (b) Binaphthylhydrazide (solution in DMF with scan rate of  $50 \text{ mVs}^{-1}$ )

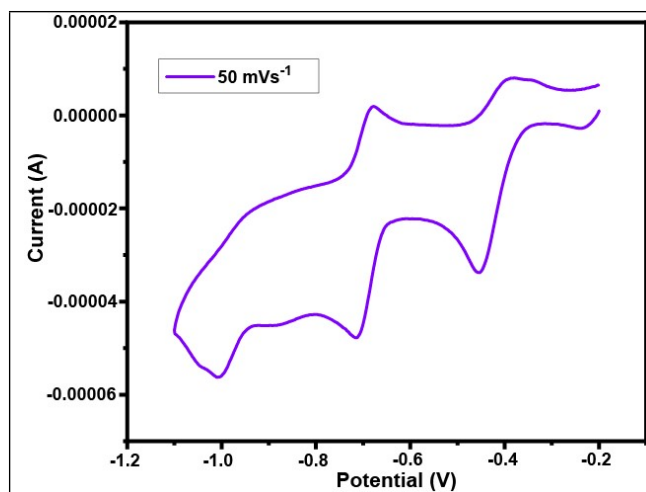

(i)

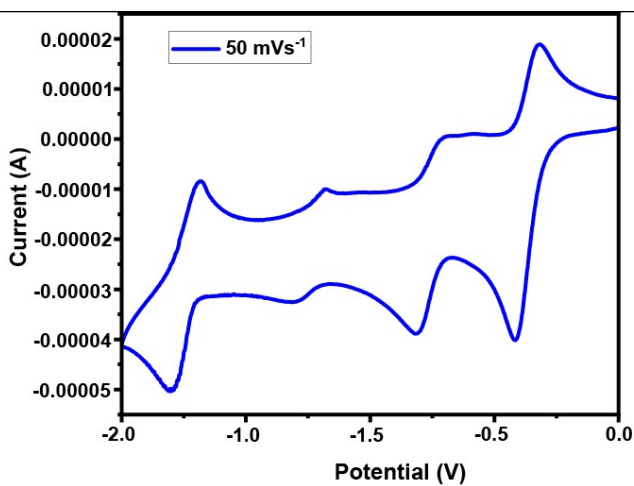

(ii)

Figure S23: Cyclic-voltammogram of the compounds (a)  $[(\text{HNaphthylhydrazide})[\text{Fe}(2,6\text{-pdc})_2] \cdot \text{H}_2\text{O}]$  and (b)  $[(\text{H}_2\text{Binaphthylhydrazide})[\text{Fe}(2,6\text{-pdc})_2]_2 \cdot 4.5\text{H}_2\text{O}]$  in DMF (scan rate of  $50 \text{ mVs}^{-1}$ ).

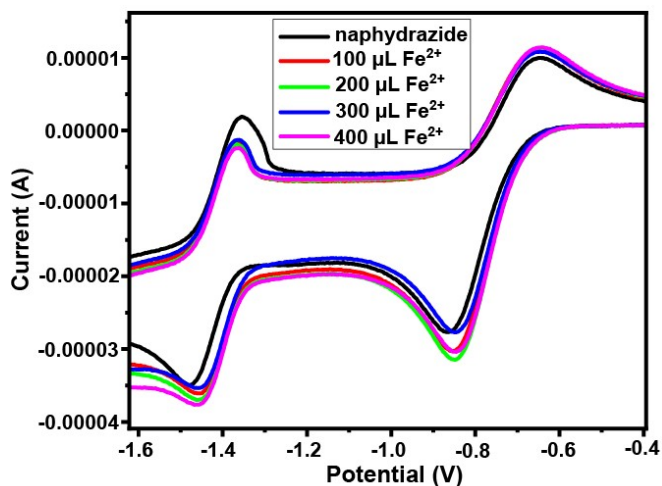

(a)

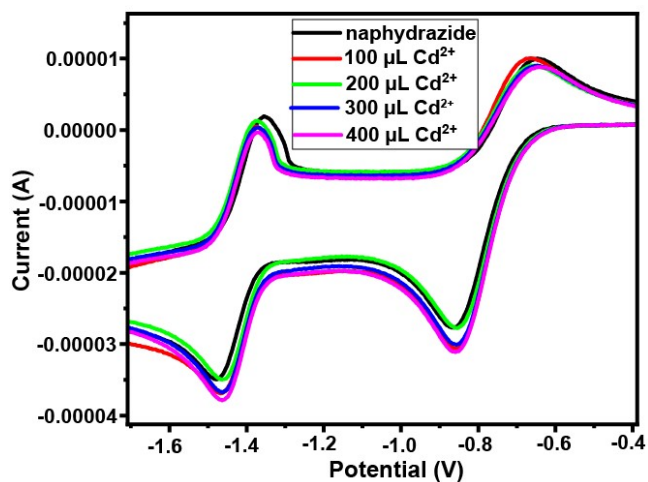

(b)

Figure S24: Cyclic-voltammetric titrations of solution of (a) Naphthylidene-1-phenylhydrazine in DMF (1 mM) with each addition of 100  $\mu\text{L}$  solution of  $\text{Fe}^{2+}$  ions (1 mM In water) (b) Naphthylidene-1-phenylhydrazine (31 mM in DMF) solution with each time addition of 100  $\mu\text{L}$  solution of  $\text{Cd}^{2+}$  ions (1 mM in water).

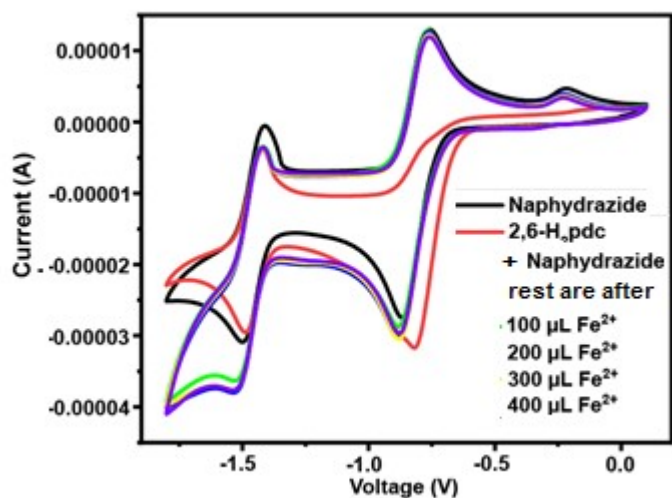

Figure S25: Cyclic-voltammetric titration of Naphthylidene-1-phenylhydrazine and 2,6-H<sub>2</sub>pdc (1mM, 10 mL of each) in DMF to which solution of  $\text{Fe}^{2+}$  ions was added (100  $\mu\text{L}$  solution in different aliquots from a 1 mM solution of the corresponding stock solution of the metal ion).

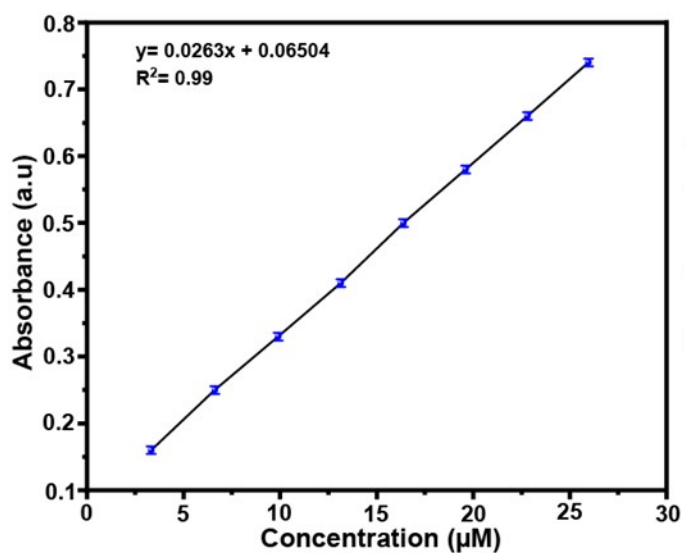

(a)

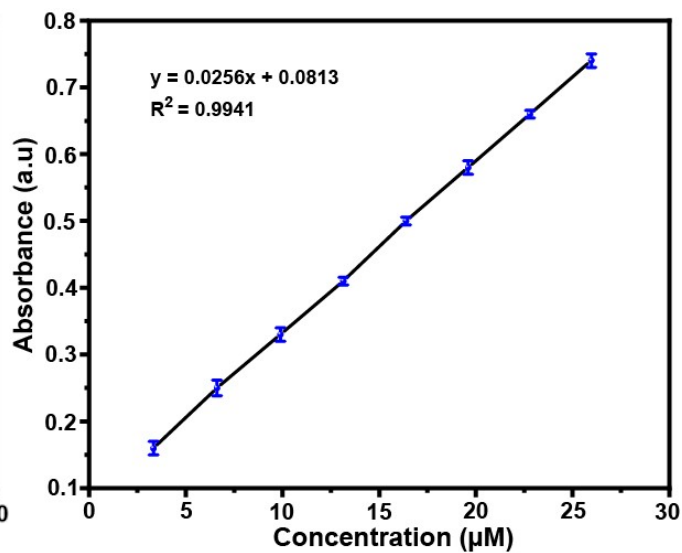

(b)

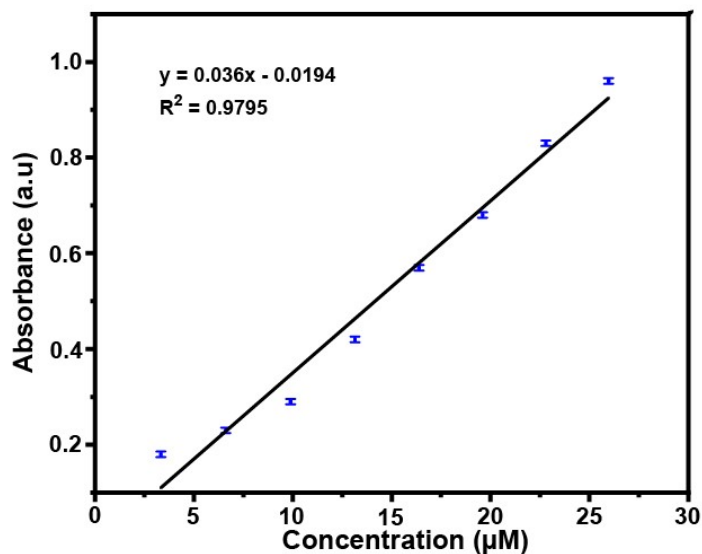

(c)

Figure S26: Plots of the changes in the intensity of absorptions of solutions of (a) Naphhydrazide and 2,6-H<sub>2</sub>pdc concentration (b) 2,6-H<sub>2</sub>pdc and (c) Naphhydrazide upon addition of Fe<sup>3+</sup> (Used for determining limit of detections).

Table S1 : The  $E_{pc}$ ,  $E_{pa}$  and  $E_{1/2}$  values observed in cyclic-voltamogram

| Compound/complex                                                                        | $E_{pc}/V$                | $E_{pa}/V$                | $E_{1/2}/V$               |
|-----------------------------------------------------------------------------------------|---------------------------|---------------------------|---------------------------|
| Naphydrazide                                                                            | -0.713 and -1.364         | -0.902 and -1.279         | -0.807 and -1.321         |
| Binaphydrazide                                                                          | -0.753 and -1.189         | -0.876 and -1.304         | -0.815 and -1.247         |
| [(HNaphydrazide)[Fe(2,6-pdc) <sub>2</sub> ] $\cdot$ H <sub>2</sub> O                    | -0.455, -0.715            | -0.380, -0.679 and -1.02  | -0.418 and -0.697         |
| [(H <sub>2</sub> Binaphydrazide)[Fe(2,6-pdc) <sub>2</sub> ] $\cdot$ 4.5H <sub>2</sub> O | -0.319, -0.714 and -1.688 | -0.414, -0.818 and -1.800 | -0.367, -0.766 and -1.744 |

Table S2: Metal-ligand bond-angles and bond-distances in the two complexes

| Bond-length (Å) |           | [(HNaphydrazide)[Fe(2,6-pdc) <sub>2</sub> ] $\cdot$ H <sub>2</sub> O |           |
|-----------------|-----------|----------------------------------------------------------------------|-----------|
|                 |           | Bond angle (°)                                                       |           |
| Fe1-O10         | 1.998(19) | O10-Fe1-O9                                                           | 150.68(6) |
| Fe1-O9          | 2.015(2)  | O10-Fe1-O6                                                           | 94.68(8)  |
| Fe1-O6          | 2.025(2)  | O9-Fe1-O6                                                            | 94.36(8)  |
| Fe1-O5          | 2.037(2)  | O10-Fe1-O5                                                           | 94.14(7)  |
| Fe1-N4          | 2.064(2)  | O9-Fe1-O5                                                            | 91.36(8)  |
| Fe1-N5          | 2.071(2)  | O6-Fe1-O5                                                            | 150.87(7) |
|                 |           | O10-Fe1-N4                                                           | 116.14(8) |
|                 |           | O9-Fe1-N4                                                            | 93.12(8)  |
|                 |           | O6-Fe1-N4                                                            | 75.76(8)  |
|                 |           | O5-Fe1-N4                                                            | 75.43(7)  |
|                 |           | O10-Fe1-N5                                                           | 75.35(9)  |
|                 |           | O9-Fe1-N5                                                            | 75.33(8)  |
|                 |           | O6-Fe1-N5                                                            | 108.09(7) |
|                 |           | O5-Fe1-N5                                                            | 100.99(7) |
|                 |           | N4-Fe1-N5                                                            | 167.94(6) |
| Bond-length (Å) |           | (H <sub>2</sub> Binaphydrazide)[Fe(2,6-pdc) <sub>2</sub> ]           |           |
|                 |           | Bond-angle (°)                                                       |           |
| Fe1-O10         | 1.987(2)  | O10-Fe1-O9                                                           | 151.86(8) |
| Fe1-O9          | 2.005(18) | O10-Fe1-O4                                                           | 94.17(9)  |
| Fe1-O4          | 2.012(18) | O9-Fe1-O4                                                            | 93.01(8)  |
| Fe1-O7          | 2.047(18) | O10-Fe1-O7                                                           | 93.36(8)  |
| Fe1-N5          | 2.049(2)  | O9-Fe1-O7                                                            | 93.08(8)  |
| Fe1-N4          | 2.051(2)  | O4-Fe1-O7                                                            | 151.70(8) |
|                 |           | O10-Fe1-N5                                                           | 76.32(9)  |
|                 |           | O9-Fe1-N5                                                            | 75.97(8)  |
|                 |           | O4-Fe1-N5                                                            | 114.9(8)  |
|                 |           | O7-Fe1-N5                                                            | 93.38(8)  |
|                 |           | O10-Fe1-N4                                                           | 100.48(8) |
|                 |           | O9-Fe1-N4                                                            | 107.65(8) |
|                 |           | O4-Fe1-N4                                                            | 76.52(7)  |
|                 |           | O7-Fe1-N4                                                            | 75.29(7)  |
|                 |           | N5-Fe1-N4                                                            | 168.14(8) |

Table S3: Selected examples of receptors used in the detection of Fe<sup>2+</sup> and Fe<sup>3+</sup> ions and detection limits.

| Technique                                                                                                   | Receptor                                                               | Comment                                                                                    | Detection limit                                       | Reference |
|-------------------------------------------------------------------------------------------------------------|------------------------------------------------------------------------|--------------------------------------------------------------------------------------------|-------------------------------------------------------|-----------|
| Colorimetric                                                                                                | Curcumin paper                                                         | Fe <sup>3+</sup>                                                                           | -                                                     | 1S        |
|                                                                                                             | Silver nano-particle                                                   |                                                                                            | 25 μM                                                 | 2S        |
|                                                                                                             | N-20-Hydroxyl-10-naphthyl methylene-3-hydroxyl-2-amino pyridine (NNAP) | Fe <sup>3+</sup>                                                                           | 1.3 nM                                                | 3S        |
|                                                                                                             | 6-Thiophen-2-yl-5,6-dihydrobenzo[4,5]imidazo-[1,2-c]quinazoline        | Fe <sup>2+</sup> and Fe <sup>3+</sup>                                                      | 3.7 nmol L <sup>-1</sup> and 1.3 nmol L <sup>-1</sup> | 4S        |
|                                                                                                             | Superparamagnetic iron oxide nanoparticles, 1,10-phenanthroline        | Fe <sup>2+</sup> and Fe <sup>3+</sup>                                                      | --                                                    | 5S        |
|                                                                                                             | Complexometric 1,10-phenanthroline                                     | Fe <sup>2+</sup>                                                                           | -                                                     | 6S        |
|                                                                                                             | Fenton process                                                         | Fe <sup>2+</sup>                                                                           | -                                                     | 7S        |
|                                                                                                             | 1,10-phenanthroline                                                    | Fe <sup>2+</sup> /Fe <sup>3+</sup>                                                         | range of 1–10 μg ferrous iron                         | 8S        |
|                                                                                                             | Ferrozine, 2,2'-bipyridine                                             | Fe <sup>2+</sup>                                                                           | -                                                     | 9S        |
|                                                                                                             | 2,2'-Bipyridyl and with 2,2',2'-terpyridyl.                            | Fe <sup>2+</sup>                                                                           | -                                                     | 10S       |
|                                                                                                             | 4,7-Diphenyl-1,10-phenanthroline                                       | Fe <sup>2+</sup>                                                                           | -                                                     | 11S       |
|                                                                                                             | 1,10-Phenanthroline                                                    | Fe <sup>2+</sup>                                                                           | -                                                     | 12S       |
|                                                                                                             | hydroxyl radicals                                                      | Fe <sup>2+</sup>                                                                           | -                                                     | 13S       |
|                                                                                                             | Ag <sup>+</sup> and 1,10-phenanthroline                                | Fe <sup>2+</sup>                                                                           | -                                                     | 14S       |
|                                                                                                             | Fluorescence                                                           | 1,1-Bis(2-((E)-(2-hydroxynaphthalene-1-yl)methylene)amino)ethyl)-3-(4-nitrophenyl)thiourea | Fe <sup>3+</sup>                                      | 3.10 μM   |
| Silver Nanoparticles/ biosurfactants                                                                        |                                                                        | Fe <sup>2+</sup> and Fe <sup>3+</sup>                                                      | 1 μM and 5 μM                                         | 16S       |
| quinoline derivative appended with rhodamine-6G                                                             |                                                                        | Selective over Fe <sup>2+</sup>                                                            | 10 <sup>-8</sup> M                                    | 17S       |
| Carbon dots derived from cranberry beans                                                                    |                                                                        | Fe <sup>3+</sup>                                                                           | 9.55 μM                                               | 18S       |
| Cd-MOF of benzo-(1,2;3,4;5,6)-tris (thiophene-2'-carboxylic acid                                            |                                                                        | Fe <sup>3+</sup>                                                                           | 1.03 μM                                               | 19S       |
| Tetramethylpropylenediamine with phenylacetylene base conjugated oligomer-PPETE                             |                                                                        | Fe <sup>2+</sup> /Fe <sup>3+</sup>                                                         |                                                       | 20S       |
| SnS <sub>2</sub> QDs                                                                                        |                                                                        | Fe <sup>3+</sup>                                                                           | 0.84 μM                                               | 21S       |
| 3-Amino-5-(thiazol-2-yl)-[1,1'-biaryl]-2,4-dicarbonitriles                                                  |                                                                        | Fe <sup>3+</sup>                                                                           | 0.18 μM                                               | 22S       |
| Bi <sub>2</sub> S <sub>3</sub> -TiO <sub>2</sub> nanoparticles                                              |                                                                        | Fe <sup>3+</sup>                                                                           | 0.1173 μM                                             | 23S       |
| RhB-CdTe@SiO <sub>2</sub> QDs                                                                               |                                                                        | Fe <sup>3+</sup>                                                                           | 20.5 nM,                                              | 24S       |
| ATP C- nano dots                                                                                            |                                                                        |                                                                                            | 0.33 μM                                               | 25S       |
| Zinc MOF of 2,5-bis(3',5'-dicarboxylphenyl)-benzoic acid                                                    |                                                                        | Fe <sup>3+</sup>                                                                           | 0.54 ppm                                              | 26S       |
| B, N, S-co-doped carbon dots of 2,5-diaminobenzenesulfonic acid and 4-aminophenylboronic acid hydrochloride |                                                                        | Fe <sup>3+</sup>                                                                           | 0.3–546 μM                                            | 27S       |
| La(III) MOF of 2,4,6-tri-p-carboxyphenyl pyridine                                                           |                                                                        | Fe <sup>3+</sup>                                                                           | 16.6 μM                                               | 28S       |

|              |                                                                              |                                    |                           |           |
|--------------|------------------------------------------------------------------------------|------------------------------------|---------------------------|-----------|
|              | (Z)-2-(1-(3-Oxo-3H-benzo[f]chromen-2-yl)ethylidene)hydrazine-1-carbothioamid | Fe <sup>3+</sup>                   | 0.76 mM                   | 29S       |
|              | Pyrene derivative                                                            | Fe <sup>3+</sup>                   | -                         | 30S       |
|              | 3',5,5'-Tetramethylbenzidine (TMB) dots (Near-infrared)                      | Fe <sup>3+</sup>                   | 0.17 μM                   | 31S       |
|              | N-doped C-dots                                                               | Fe <sup>3+</sup>                   | 2.21 nM                   | 32S       |
|              | Rhodamine-B armed fluorescent chemosensor                                    |                                    | 0.16 μm                   | 33S       |
|              | N, N'-disubstituted imidazolium salts                                        | Fe <sup>3+</sup>                   | 2.81 × 10 <sup>-5</sup> M | 34S       |
|              | Amino acid-modified graphene quantum dots                                    | Fe <sup>3+</sup>                   | 50nM                      | 35S       |
|              | Biosurfactant capped silver nanoparticles                                    | Fe <sup>2+</sup> /Fe <sup>3+</sup> | Distinguishes at μM level | 36S       |
|              | Copper nanocluster                                                           | Fe <sup>3+</sup>                   | 10 nM                     | 37S       |
|              | GQDs (Graphene quantum dots)                                                 | Fe <sup>3+</sup>                   | -                         | 38S       |
|              | GQDs with aspartic acid/ NH <sub>4</sub> HCO <sub>3</sub>                    | Fe <sup>3+</sup>                   | 260nM                     | 39S       |
|              | GQDs with itric acid hydrazine                                               | Fe <sup>3+</sup>                   | 90nM                      | 40S       |
|              | GQDs with citric acid                                                        | Fe <sup>3+</sup>                   | 1000 nM                   | 41S       |
|              | S-Doped GQDs                                                                 | Fe <sup>3+</sup>                   | 4.2nM                     | 42S       |
|              | Glycine modified GQDs                                                        | Fe <sup>3+</sup>                   | 100nM                     | 43S       |
|              | Rhodamine B modified GQDs,                                                   | Fe <sup>3+</sup>                   | 20nM                      | 44S       |
|              | Polystyrenic anion-exchange resin with GQDs                                  | Fe <sup>3+</sup>                   | 650 nM                    | 45S       |
|              | MOF-derived c (ZIF-8C) GQDs                                                  | Fe <sup>3+</sup>                   | 80nM                      | 46S       |
|              | Ordered C-SiO <sub>2</sub>                                                   | Fe <sup>3+</sup>                   | 300nM                     | 47S       |
|              | Nitrogen-GQDs                                                                | Fe <sup>3+</sup>                   | 0.22 μM,                  | 48S       |
|              | Hydrazone modified GQDs                                                      | Fe <sup>3+</sup>                   | 2.5 μM                    | 49S       |
|              | Amino-functionalized GQDs                                                    | Fe <sup>3+</sup>                   | 5.36 μM                   | 50S       |
|              | GQDs with <i>Miscanthus</i> biorefinery waste                                | Fe <sup>3+</sup>                   | 1.41 nM                   | 51S       |
|              | GQDs                                                                         | Fe <sup>3+</sup>                   | 7220 nM                   | 52S       |
|              | Rhodamine B hydrazide and naphthyl chromon turn on                           | Fe <sup>3+</sup>                   | 0.16 μM                   | 53S       |
|              | Rhodamine–bistriazole                                                        | Fe <sup>3+</sup>                   | 0.15 μM                   | 54S       |
|              | Functionalized Graphene Quantum Dots                                         | Fe <sup>3+</sup>                   | 5.3 μM                    | 55S       |
| Voltametric  | N-doped graphene quantum dots                                                | Fe <sup>3+</sup>                   | 0.87 μM                   | 56S       |
| Colorimetric | Naphhydrazide                                                                | Fe <sup>3+</sup>                   | 0.46 μM                   | This work |
|              | 2,6-H <sub>2</sub> pdc                                                       | Fe <sup>3+</sup>                   | 1.28 μM                   | This work |
|              | Naphhydrazide and 2,6-H <sub>2</sub> pdc                                     | Fe <sup>3+</sup>                   | 0.09 μM                   | This work |

Table S4: Selected examples of receptors used in detection of Cd<sup>2+</sup> ions and detection limits.

| Mode of sensing | Receptor                                          | Detection limit                      | Reference | Comment |
|-----------------|---------------------------------------------------|--------------------------------------|-----------|---------|
| Visual          | Bacterial whole-cell biosensor                    | 0.034 μg/L                           | 57S       | -       |
| Visual          | Bacterial whole-cell Biosensor                    | 26.7 nM                              | 58S       | -       |
| Conductance     | Conducting bismuth encapsulated carbon nano-sheet | Sensitivity 0.48 μA μg <sup>-1</sup> | 59S       | -       |
| Conductance     | Conducting polythiophene                          | -                                    | 60S       | -       |



|                                          |                                                                                                    |                                        |     |                                                  |
|------------------------------------------|----------------------------------------------------------------------------------------------------|----------------------------------------|-----|--------------------------------------------------|
| Fluorescence                             | Thiophene linked polypyridyl                                                                       | -                                      | 61S |                                                  |
| Colorimetric                             | Semiconductin CdTe Q-dot                                                                           | -                                      | 62S | -                                                |
| Fluorescence                             | Squaramides                                                                                        | -                                      | 63S | Distinguishes Cd <sup>2+</sup> /Zn <sup>2+</sup> |
| Fluorescence                             | Thiophene-Appended Benzothiazole                                                                   |                                        | 64S |                                                  |
| Fluorescence                             | Vitamin B <sub>6</sub> Cofactor-Conjugate                                                          | 59.0 × 10 <sup>8</sup> M               | 65S | -                                                |
| Aggregation induced emission (AIE)       | Diimidazolylbenzene                                                                                | -                                      | 66S | Turn-OFF Fe <sup>3+</sup>                        |
| AIE                                      | Cyclodextrin tetraphenylethene (TPE) and CD <i>via</i> click chemistry.                            | 0.01 μM                                | 67S |                                                  |
| AIE                                      | <i>N</i> -(3-methoxy-2-hydroxybenzylidene)-3-hydroxy-2-naphthahydrazone                            | 1.27 × 10 <sup>-7</sup> M              | 68S | Distinguishes Cd <sup>2+</sup> /Zn <sup>2+</sup> |
| NIR                                      | Conjugated chain functionalized with amide of substituted amidoglycol                              | 3.1 μM                                 | 69S |                                                  |
| Fluorescence                             | Rhodamine B + diethylenetetramine                                                                  | 1000 μg/L                              | 70S |                                                  |
| Fluorescence                             | 4-isobutoxy-6-(dimethylamino)-8-methoxyquinoline                                                   | 9.6 pM                                 | 71S | Distinguishes Cd <sup>2+</sup> /Zn <sup>2+</sup> |
| Colorimetric                             | Gold nano particles                                                                                | 5.35 pM                                | 72S |                                                  |
| Fluorescence                             | ( <i>S,S</i> )- <i>N,N,N',N'</i> -tetrakis(6-methoxy-2-quinolylmethyl)-1,2-diphenylethylenediamine | -                                      | 73S | Cd <sup>2+</sup> /Zn <sup>2+</sup> interfere     |
| Fluorescence                             | <i>N,N,N',N'</i> -tetrakis(2-Quinolylmethyl)ethylenediamine                                        | 19 nM                                  | 74S | Zn <sup>2+</sup> superior                        |
| Fluorescence                             | Di-2-Picolylamine-Substituted Quinoline-Based Tolans                                               | 158 nM                                 | 75S |                                                  |
| fluorescence                             | Perylene bisimide derivative with lactose and dipyridylamine                                       | 5.2 × 10 <sup>-7</sup> M               | 76S |                                                  |
| Fluorescence                             | 4,4-Difluoro-4-bora-3a,4a-diaza-s-indacene (BODIPY derivative)                                     | 1.80 × 10 <sup>-7</sup> M              | 76S | Distinguishes Cd <sup>2+</sup> /Zn <sup>2+</sup> |
| Förster resonance energy transfer (FRET) | Quinoline–benzothiazole system                                                                     | 2.7 × 10 <sup>-7</sup> M               | 77S | -                                                |
| Voltametric                              | Silver nanoparticles from <i>Allium sativum</i>                                                    | 0.277 μM                               | 78S | -                                                |
| FRET                                     | 7-Amino-4-methylcoumarin                                                                           | 1.01 × 10 <sup>-8</sup> M              | 79S | -                                                |
| Fluorescence                             | 2,2'-(Ethane-1,2-diylbis(oxy))bis( <i>N,N</i> -bis(pyridine-2-ylmethyl)aniline                     | 3.77 × 10 <sup>4</sup> M <sup>-1</sup> | 80S | Hg <sup>2+</sup> interfere                       |
| Fluorescence                             | 4,5-Quinolimide-based                                                                              | 11 nM                                  | 81S | -                                                |
| Fluorescence                             | 2-6 Pyridyl substituted Quinoline based                                                            | 2.165 × 10 <sup>-7</sup> M             | 82S | No zinc interference                             |
| Fluorescence                             | Quinoline based receptor with cystine                                                              | Cd quench, Zn not                      | 83S | -                                                |
| Fluorescence                             | Carbazolone as fluorophore and <i>N,N</i> -bis(2-pyridylmethyl)ethylenediamine (BPEA) as chelator  | -                                      | 84S | -                                                |
| Fluorescence                             | Polyethylenimine-salicylaldehyde /Sulphide                                                         | 10 nM                                  | 86S | Distinguish Cd <sup>2+</sup> /Zn <sup>2+</sup>   |
| Voltametric                              | Anodic stripping voltammetry                                                                       | 1 ng/L                                 | 87S | -                                                |
|                                          | Carbon Dots                                                                                        | 0.30 μM                                | 88S | -                                                |
| Colorimetric                             | Peptide-modified gold nanoparticles                                                                | 0.05 μM                                | 89S | -                                                |
| Fluorescence                             | Silver NPs                                                                                         | 4.95 μM                                | 90S | -                                                |
| Fluorescence                             | L-Carnitine capped CdSe/ZnS quantum dots                                                           | 0.15 μM                                | 91S | -                                                |
| Colorimetric                             | Chitosan dithiocarbamate functionalized gold nanoparticles                                         | 63 nM                                  | 92S | -                                                |
| Fluorescence                             | Zn-Ag-In-S quantum dots                                                                            | 1.56 μM                                | 93S | -                                                |
| Fluorescence                             | Porphyrin-appended terpyridine                                                                     | 1.2 × 10 <sup>-6</sup> M               | 94S | -                                                |
| Colorimetric                             | 1-Amino-2-naphthol-4-sulfonic acid functionalized silver nanoparticles                             | 87 nM                                  | 95S | -                                                |
| Fluorescence                             | AuNPs with 4-amino-3-hydrazino-5-mercapto-1,2,4-triazole                                           | 30 nM                                  | 96S | -                                                |
| Fluorescence                             | Fluorescein isothiocyanate QD                                                                      | 12 nM                                  | 97S | -                                                |
| Colorimetric                             | Guanidine thiocyanate AuNPs                                                                        | 10 nM                                  | 98S | -                                                |
| Fluorescence                             | Green-synthesized gold nanoparticles                                                               | 1.13 × 10 <sup>-10</sup> M             | 99S | -                                                |

|              |                                                                                                                                                                 |                         |           |                            |
|--------------|-----------------------------------------------------------------------------------------------------------------------------------------------------------------|-------------------------|-----------|----------------------------|
| Fluorescence | L-Cysteine functionalized gold-silver nanoparticles                                                                                                             | 44 nM                   | 100S      | -                          |
| Fluorescence | Thioglycerolfunctionalized CdSe quantum dots                                                                                                                    | 0.32 $\mu$ M            | 101S      | -                          |
| Colorimetric | Gold nanoparticle with 5-sulfosalicylic acid                                                                                                                    | 3.0 nM                  | 102S      | -                          |
| Fluorescence | AgInZnS-QDs                                                                                                                                                     | 37.8 nM                 | 103S      | -                          |
| Colorimetric | AuNPs with ssDNA                                                                                                                                                | 4.6 nM                  | 104S      | -                          |
| Fluorescence | AuNPs with di-(1H-pyrrol-2-yl) methanethione                                                                                                                    | 16.6 nM                 | 105S      | -                          |
| Fluorescence | AuNPs Cysteamine and DL-glyceraldehyde                                                                                                                          | 21 nM                   | 106S      | -                          |
| Fluorescence | NB-CQDs 2-amino-3-hydroxypyridine, sodium borohydride and L-cysteine                                                                                            | 0.45 $\mu$ M            | 107S      | --                         |
| Fluorescence | Dialkyne and indole azide                                                                                                                                       | 2.69 $\mu$ M            | 108S      | -                          |
| Fluorescence | AuNPs 2,6-dimercaptopurine                                                                                                                                      | 3.66 $\mu$ M            | 109S      | -                          |
| Fluorescence | AgNPs Chalcon carboxylic acid                                                                                                                                   | 0.13 $\mu$ M            | 110S      | -                          |
| FRET         | Spirolactam, xanthene and coumarin conjugate                                                                                                                    | $1.01 \times 10^{-8}$ M | 111S      | -                          |
| Fluorescence | {(H <sub>2</sub> pip)[Mn(pydc-2,5) <sub>2</sub> (H <sub>2</sub> O)]·2H <sub>2</sub> O} {H <sub>2</sub> pip=piperazinedium, pydc-2,5=pyridine-2,5-dicarboxylate} | 1.25 $\mu$ M            | 112S      | Zn <sup>2+</sup> interfere |
| Fluorescence | Naphydrazide and 2,6-H <sub>2</sub> pdcc                                                                                                                        | 18.31 $\mu$ M           | This work |                            |

### References for Table 3S and 4S:

- 1S. S. Wirojsaengthong, W. Aeungmaitrepirom, F. Unob, S. Fuangswasdi, P. Varanusupakul, K. Mueangdech, T. Treetos, P. Puthongkham, *J. Chem. Ed.*, 2023, **100**, 3604 – 3611.
- 2S. A. Ali, F. Hussain, S. Attacha, A. Kalsoom, W. A. Qureshi, M. Shakeel, J. Militky, B. Tomkova, D. Kremenakova, *Nanomaterials*, 2021, **11**, 2076.
- 3S. Z. Yan, Y. Zhu, J. Xu, C. Wang, Y. Zheng, P. Li, L. Hu and J. You, *Anal. Methods*, 2017, **9**, 6240 – 6245.
- 4S. 3. S. Sen, S. Sarkar, B. Chattopadhyay, A. Moirangthem, A. Basu, K. Dhara, P. Chattopadhyay, *Analyst*, 2012, **137**, 3335 – 3342.
- 5S. C. Jiang, S. Yang, N. Gan, H. Pan, H. Liu, *J. Magn. Magn. Mater.*, 2017, **439**, 126 – 134.
- 6S. J. Zhu, X. Yang, F. Fan, Y. Li, *Appl. Water Sci.*, 2018, **8**, 228.
- 7S. L. Yang, G. Yao, *Int. J. Environ. Anal. Chem.* 2022, **102**, 3194 – 3206.
- 8S. 40. L. Herrera, P. Ruiz, J. C. Aguillon, A. Fehrmann, *J. Chem. Tech. Biotech.*, 1989, **44**, 171 – 181.
- 9S. G. L. Smith, A. A. Reutovich, A. K. Srivastava, R. E. Reichard, C. H. Welsh, A. Melman, F. Bou-Abdallah, *J. Inorg. Biochem.*, 2021, **220**, 111460.
- 10S. M. L. Moss, M. G. Mellon, *Ind. Eng. Chem. Anal. Ed.*, 1942, **14**, 862 – 865.
- 11S. L. J. Clark, *Anal. Chem.*, 1962, **34**, 348 – 352.
- 12S. H. Tamura, K. Goto, T. Yotsuyanagi, M. Nagayama, *Talanta*, 1974, **21**, 314 – 318.
- 13S. M. Tong, S. Yuan, S. Ma, M. Jin, D. Liu, D. Cheng, X. Liu, Y. Gan, Y. Wang, *Environ. Sci. Technol.*, 2016, **50**, 214 – 221.
- 14S. J. E. Amonette, J. Matyas, *Anal. Chim Acta*, 2016, **910**, 25 – 35.
- 15S. .S. Moon, M. Lee, C. Kim, *ChemistrySelect*, 2022, **7**, e202201353.

- 16S. K. Dayanidhi, N. Sheik Eusuff, *New J. Chem.*, 2021, **45**, 9936 – 9943.
- 17S. S. Das, K. Aich, S. Goswami, C. K. Quah, H. K. Fun, *New J. Chem.*, 2016, **40**, 6414 – 6420.
- 18S.M. Zulfajri, G. Gedda, C. -J. Chang, Y. P. Chang, G. Huang, *ACS Omega*, 2019, **4**, 15382 – 15392.
- 19S. P. Li, X. Chen, C. Guo, H. Zou, Z. Chen, B. Liu, W. Liang, J. Cai and H. Xu, *Eur. J. Inorg. Chem.*, 2023, **26**, e202200576
- 20S. M. E. A. Fegley, T. Sandgren, J. L. Duffy-Matzner, A. Chen, W. E. Jones Jr., *Polymer Chem.*, 2015, **53**, 951 – 954.
- 21S. R. R.Srivastava, V. K. Singh, A.Srivastava, *Optical Mater.*, 2020, **109**, 110337.
- 22S. B. Mariammal, A. Shylaja, S.V. Kumar, S. R. Rubina, R. R. Kumar, *J. Heterocyclic Chem.*, 2020, **57**, 3882 – 3889.
- 23S. A. Syal, D. Sud, *Sensors and Actuators B: Chemical*, 2018, **266**, 1 - 8.
- 24S. H. Wu, L. Yang, L. Chen, F. Xiang, H. Gao, *Anal. Methods*, 2017, **9**, 5935 – 5942.
- 25S. J. Shangguan, J. Huang, D. He, X. He, K. Wang, R. Ye, X. Yang, T. Qing, J. Tang, *Anal. Chem.*, 2017, **89**, 7477 – 7484.
- 26S. J. Wang, X. R. Wu, J. Q. Liu, B. H. Li, A. Singh, A. Kumar, S. R. Batten, *CrystEngComm*, 2017, **19**, 3519 – 3525.
- 27S. Y. Liu, W. Duan, W. Song, J. Liu, C. Ren, J. Wu, H. Chen, *ACS Appl. Mater. Interfaces*, 2017, **9**, 12663.
- 28S. J. Xia, Y. T. Zhuang, Y. L. Yu and J. H. Wang, *Microchim. Acta*, 2017, **184**, 1109 – 1116.
- 29S. G. M. Khairy, A.S. Amin, S, M. N. Moalla, A. Medhat, N. Hassan, *RSC Adv.*, 2022, **12**, 27679 – 27686.
- 30S. R.-X. Zhu, S. Yu, P. -B. Zhu, X. Gou, X. -Z. Yang, Hui Liu, L. -B. Xing, *J. Photochem. Photobio. A: Chemistry*, 2024, **450**, 115440.
- 31S. X. Qin, C. Chen, S. Zhang, J. Zhu, Y. Wang, J. Liu, *Anal. Methods*, 2019, **11**, 5007.
- 32S. P. Lesani, G. Singh, C. M. Viray, Y. Ramaswamy, D. M. Zhu, P. Kingshott, Z. Lu, H. Zreiqat, *ACS Appl. Mater. Interfaces*, 2020, **12**, 18395.
- 33S. D. Das, R. Alam, M. Sasmal, A. Katarkar, A. Dutta, M. Ali, *Inorg. Chim. Acta*, 2024, **563**, 121902.
- 34S. S. Chaudhary, M. D. Milton, *J. Photochem. Photobio. A: Chem.*, 2018, **356**, 595.
- 35S. Q. Ma, J. Song, S. Wang, J. Yang, Y. Guo, C. Dong, *Appl. Surf. Sci.*, 2016, **389**, 995 – 1002.
- 36S. H. Sharma, S. Chaudhary, S. Nirwan, R. Kakkar, H. S. Liew, M. L. Low, C. -W. Mai, L.-W. Hii, C. -O. Leong, M. D. Milton, *ChemistrySelect*, 2022, **7**, e202203239.
- 37S. H. Cao, Z. Chen, H. Zheng and Y. Huang, *Biosens. Bioelectron.*, 2014, **62**, 189 – 195.
- 38S. D. Wang, L. Wang, X. Dong, Z. Shi, J. Jin, *Carbon*, 2012, **50**, 2147 – 2154.
- 39S. C. F. Zhang, Y. Y. Cui, L. Song, X. F. Liu, Z. Hu, *Talanta*, 2016, **150**, 54 – 60.
- 40S. J. Ju, W. Chen, *Biosens. Bioelectron.*, 2014, **58**, 219 – 225.

- 42S. T. Tran Van, T. Nguyen Bao, H. R. Kim, J. S. Chung, W. M. Choi, *Sens. Actuators B Chem.*, 2014, **202**, 568 – 573.
- 43S. S. H. Li, Y. C. Li, J. Cao, J. Zhu, L. Z. Fan, X. H. Li, *Anal. Chem.*, 2014, **86**, 10201 – 10207.
- 44S. L.B. Li, L. Li, C. Wang, K.Y. Liu, R.H. Zhu, H. Qiang, Y.Q. Lin, *Microchim. Acta*, 2015, **182**, 763 – 770.
- 45S. R. H. Guo, S. X. Zhou, Y. C. Li, X. H. Li, L. Z. Fan, N. H. Voelcker, *ACS Appl. Mater. Interfaces*, 2015, **7**, 23958 – 23966.
- 46S. A. Ananthanarayanan, X. W. Wang, P. Routh, B. Sana, S. Lim, D. H. Kim, K. H. Lim, J. Li, P. Chen, *Adv. Funct. Mater.*, 2014, **24**, 3021 – 3026
- 47S. W. J. Zhang, J. Gan, *Appl. Surf. Sci.*, 2016, **372**, 145 – 151.
- 48S. H. B. Xu, S. H. Zhou, L. L. Xiao, H. H. Wang, S.Z. Lia, Q. H. Yuan, *J. Mater. Chem. C*, 2015, **3**, 291 – 297.
- 49S. H. B. Xu, S. H. Zhou, L. L. Xiao, S. Z. Li, T. Song, Y. Wang, Q. H. Yuan, *Carbon*, 2015, **87**, 215 – 225.
- 50S. B. Zhang, Y. Luo, B. Peng, L. Zhang, N. Xie, D. Yue, W. Li, B. Qin, W. Du, Z. Wang, Y. Zhang, *J. Mol. Struct.*, 2024, **1304**, 137739.
- 51 S. -L. Ji, S. -S. Xiao, L. -L. Wang, *Spectrochim. Acta A: Mol. Biomol. Spect.*, 2022, **280**, 121541.
- 52S. S. -F. Chin, S. -C. Tan, S.- C. Pang, S. -M. Ng, *Optical Materials*, 2017, **73**, 77 – 82.
- 53S. N. Vijay, S. P. Wu, S. Velmathi, *Journal of Photochemistry and Photobiology A: Chemistry*, 2019, **384**, 112060.
- 54S. K. Wechakorn, S. Chomngam, U. Eiamprasert, P. Kongsaree, *Chem. Pap.*, 2021, **75**, 883.
- 55S. Kang, S., Han, H., Lee, K., Kim, K. M., *ACS Omega*, 2022, **7**, 2074 – 2081.
- 56S. Y. Fu, G. Gao, J. Zhi, *J. Mater. Chem. B*, 2019, **7**, 1494 – 1502.
- 57S. L. Shen, Y. Chen, L. Hu, C. Zhang, L. Liu, L. Bao, J. Ma, H. Wang, X. Xiao, L. Wu, S. Chen, *ACS Sensors*, 2024, **9**, 654 – 661.
- 58S. Z. Cui, X. Luan, H. Jiang, Q. Li, G. Xu, C. Sun, L. Zheng, Y. Song, P. A. Davison, W. E. Huang, *Chemosphere*, 2018, **200**, 322 – 329.
- 59S. Y. Feng, H. Zhao, T. Feng, X. Liu, M. Lan, *Microchemical J.*, 2024, **197**, 109881.
- 60S. Y. Sasaki, X. Lyu, T. Kawashima, Y. Zhang, K. Ohshiro, K. Okabe, K. Tsuchiya, T. Minami, *RSC Adv.*, 2024, **14**, 5159 – 5166
- 61S. E. Saravanan, M. Sathishkumar, J. Dhanapal, K., Selin, M, Iyer, S. Kulathu, *Anal. Chim. Acta* 2024, **1288**, 342179
- 62S. J. Cao, H. Jiang, Y. Wu, X. Yu, *Colloids and Surfaces B Bio-interfaces*, 2024, **235**, 113774.
- 63S. P. Lasitha, S. Dasgupta, P. G. Naresh, *ChemPhysChem*, 2020, **21**, 1564 – 1570.
- 64S. P. Purushothaman, S. Karpagam, *ACS Omega*, 2022, **7**, 41361 – 41369,
- 65S. S. Bothra, P. Paira, A. Kumar, R. Kumar, S. K Sahoo, *ChemistrySelect*, 2017, **2**, 6023 – 6029

- 66S. C. Li, C. Gao, J. Lan, J. You, G. Gao, *Org. Biomol. Chem.*, 2014, **12**, 9524 – 9527.
- 67S. L. Zhang, W. Hu, L. Yu, Y. Wang, *Chem. Commun.*, 2015, **51**, 4298 – 5001.
- 68S. M. Wu, D. -D Yang, H. -W. Zheng, Q. -F. Liang, J. -B. Li, Y. Kang, S. Li, C. Jiao, X.-J. Zheng, L. -P. Jin, *Dalton Trans.*, 2021, **50**, 1507 – 1513.
- 69S. Y. Yang, T. Cheng, W. Zhu, Y. Xu, X. Qian, *Organic Letters* 2011, **13**, 264 – 267.
- 70S. Y. C. Reyes, T. B. Rouf, O. E. Torres, E. E. González, *ACS Agricultural Sci. Technol.*, 2022, **2**, 144 – 152.
- 71S. L. Xue, G. Li, Q. Liu, H. Wang, C. Liu, X. Ding, S. He, H. Jiang, *Inorg. Chem.*, 2011, **50**, 3680 – 3690.
- 72S. M. Bhattacharyya, M. Hossain, *J. Environ. Chem. Eng.*, 2024, **2**, 112295.
- 73S. Y. Mikata, K. Nozaki, M. Tanaka, H. Konno, A. Matsumoto, M. Kawamura, S. -I. Sato, *Inorg. Chem.*, 2020, **59**, 5313 – 5324.
- 74S. Y. Mikata, M. Kaneda, S. Yonemura, M. Akedo, H. Konno, T. Matsuo, *Dalton Trans.*, 2022, **51**, 17170 – 17179.
- 75S. M. -S. Ko, P. S. Rao, D. -G. Cho, *Molecules*, 2021, **26**, 917.
- 76S. J. -K, Xiong, K, -R. Wang, K. -X. Wang, T. -L. Han, H.-Y. Zhu, R.-X. Rong, Z. -R. Cao, X.-L. Li, *Sensors and Actuators B: Chem.*, 2019, **297**, 126802.
- 77S. A. Maity, U. Ghosh, D. Giri, D. Mukherjee, T. K. Maiti, S. K. Patra, *Dalton Trans.*, 2019, **48**, 2108 – 2117.
- 78S. K. Aich, S. Goswami, S. Das, C. D. Mukhopadhyay, C. K. Quah, H.-K. Fun, *Inorg. Chem.*, 2015, **54**, 7309 – 7315.
- 79S. A. Aravind, M. Sebastian, B. Mathew, *New J. Chem.*, 2018, **42**, 15022 – 15031.
- 80S. S. B. Maity, S. Banerjee, K. Sunwoo, J. S. Kim, P. K. Bharadwaj, *Inorg. Chem.*, 2015, **54**, 3929 – 3936.
- 81S. Y. Zhang, X. Guo, M. Zheng, R. Yang, H. Yang, L. Jia, M. Yang, *Org. Biomol. Chem.*, 2017, **15**, 2211 – 2216.
- 82S. Z. Xu, G. Li, Y.-Y. Ren, H. Huang, X. Wen, Q. Xu, X. Fan, Z. Huang, J. Huang, L. Xu. *Dalton Trans.*, 2016, **45**, 12087 – 12093.
- 83S. Y. Ma, F. Wang, S. Kambam, X. Chen, *Sensors and Actuators B: Chem.*, 2013, **188**, 1116 – 1122.
- 84S. Q. -C. Xu, X. -H. Zhu, C. Jin, G. -W. Xing, Y. Zhang, *RSC Adv.*, 2014, **4**, 3591 – 3596.
- 85S. X. -Y. Liu, D. -Y. Liu, J. Qi, Z. -G. Cui, H. -X. Chang, H. -R. He, G. -M. Yang, *Tett. Letters* 2015, **56**, 1322 – 1327.
- 86S. N. -D. Tan, J. -H. Yin, G. Pu, Y. Yuan, L. Meng, N. Xu, *Chem. Phys. Lett.* 2016, **666**, 68 – 72.
- 87S. L. Mart, H. W. Nuernberg, P. Valenta, *Zeitschrift fuer Analytische Chemie*, 1980, **300**, 350 – 362.
- 88S. Y. Xu, C. Wang, T. Jiang, G. Ran, Q. Song, *J. Hazard. Mater.*, 2022, **427**, 128092
- 89S. M. Zhang, Y. Q. Liu, B. C. Ye, *Analyst*, 2012, **137**, 601 – 607.

- 90S. S. Jabariyan, M. A. Zanjanchi, *Appl. Phys. A*, 2019, **125**, 872.
- 91S. H. B. Li, Y. Zhang, X. Q. Wang, *Sensors and Actuators B Chem.*, 2007, **127**, 593 – 597.
- 92S. V. N. Mehta, H. Basu, R. K. Singhal, S. K. Kailasa, *Sensors and Actuators B: Chem.*, 2015, **220**, 850 – 858.
- 93S. C. Wei, X. Wei, Z. Hu, D. Yang, S. Mei, G. Zhang, D. Su, W. Zhang, R. Guo, *Anal. Methods*, 2019, **11**, 2559 – 2564.
- 94S. H. -Y. Luo, J. -H. Jiang, X. -B. Zhang, C. -Y. Li, G. -L. Shen, R. -Q. Yu, *Talanta*, 2007, **72**, 575 – 581.
- 95S. P. Huang, B. Liu, W. Jin, F. Wu, Y. Wan, *J. Nanopart. Res.*, 2016, **18**, 327.
- 96S. A. -J. Wang, H. Guo, M. Zhang, D. -L. Zhou, R. -Z. Wang, J. -J. Feng, *Microchim. Acta*, 2013, **180**, 1051 – 1057.
- 97S. R. Gui, X. An, W. Huang, *Anal. Chim. Acta*, 2013, **767**, 134 – 140.
- 98S. J. R. Bhamore, A. R. Gul, S. K. Kailasa, K. -W. Kim, J. S. Lee, H. Park, T. J. Park, *Sensors and Actuators B Chem.*, 2021, **334**, 129685.
- 99S. K. Singh, V. Kumar, B. Kukkar, K. H. Kim, T. R. Sharma, *J. Environ. Sci. Technol.*, 2022, **19**, 4673 – 4690.
- 100S. J. Du, X. Hu, G. Zhang, X. Wu, D. Gong, *Anal. Lett.*, 2018, **51**, 2906 – 2919.
- 101S. N. B. Brahim, N. B. H. Mohamed, M. Echabaane, M. Haouari, R. B. Chaabane, M. Negrerie, H. B. Ouada, *Sensors and Actuators B Chem.*, 2015, **220**, 1346 – 1353.
- 102S. W. Jin, P. Huang, F. Wu, L. -H. Ma, *Analyst*, 2015, **140**, 3507 – 3513.
- 103S. Y. Liu, X. Tang, M. Deng, T. Zhu, L. Edman, J. Wang, *J. Alloy. Compd.*, 2021, **864**, 158109.
- 104S. Y. Wu, S. Zhan, L. Wang, P. Zhou, *Analyst*, 2014, **139**, 1550 – 1561.
- 105S. Y. -M. Sung, S. -P. Wu, *Sensors and Actuators B Chem.*, 2014, **201**, 86 – 91.
- 106S. R. Yadav, P. N. Patel, V.N. Lad, *Res. Chem. Intermed.*, 2018, **44**, 1 – 13.
- 107S. Z. Yan, W. Yao, K. Mai, J. Huang, Y. Wan, L. Huang, B. Cai, Y. Liu, *RSC Adv.*, 2022, **12**, 8202 – 8210.
- 108S. Y. Tang, H. Liu, G. Jiang, Z. Gu, *J. Appl. Spectrosc.*, 2017, **84**, 911 – 914.
- 109S. M.H. Hu, W.H. Huang, L.L. Suo, L.H. Zhou, L.F. Ma, H. F. Zhu, *Anal. Methods*, 2017, **9**, 5598 – 5603.
- 110S. Y. Dong, L. Ding, X. Jin, N. Zhu, *Microchim. Acta*, 2017, **184**, 3357 – 3362.
- 111S. C. Kumari, D. Sain, A. Kumar, S. Debnath, P. Saha, S. Dey, *Dalton Trans.*, 2017, **46**, 2524 – 2531
- 112S. K. K. Singha, P. Majee, S. K. Mondal, P. Mahata, *ChemistrySelect*, 2017, **2**, 3388 – 3395.
- 113S. M. Zhu, C. Shi, X. Xu, Z. Guo, W. Zhu, *RSC Adv.*, 2016, **6**, 100759 – 100764.

Table S5: Standard deviations in the detection of cadmium ions by fluorescence at 400 nm of a solution of Naphydrazide (2 mM, 2.5 mL) together with 2,6-H<sub>2</sub>pdc (20 mM, 400 μL) after incremental addition of 20 mM Cd<sup>2+</sup> in two independent experiments

(a)

| Volume of Cd <sup>2+</sup> added (μL) | Reading of Fluorescence Emission Intensity after three minutes (count per sec) |            |            | Mean       | Standard Deviation (σ) |
|---------------------------------------|--------------------------------------------------------------------------------|------------|------------|------------|------------------------|
| 0                                     | 5423.213                                                                       | 5152.456   | 5590.167   | 5388.612   | 220.897                |
| 50                                    | 43631.000                                                                      | 44851.740  | 44291.810  | 44258.180  | 611.063                |
| 100                                   | 95905.350                                                                      | 95518.450  | 93187.510  | 95537.103  | 359.283                |
| 150                                   | 133052.100                                                                     | 133687.500 | 133988.700 | 133576.100 | 478.134                |
| 200                                   | 186589.600                                                                     | 187349.400 | 187507.300 | 187148.800 | 490.615                |
| 250                                   | 258397.100                                                                     | 257512.500 | 258264.800 | 258058.100 | 477.14                 |
| 300                                   | 341005.200                                                                     | 341802.900 | 341110.400 | 341306.200 | 433.384                |

(b)

| Volume of Cd <sup>2+</sup> added (μL) | Reading of Fluorescence Emission Intensity after three minutes (count per sec) |            |            | Mean       | Standard Deviation (σ) |
|---------------------------------------|--------------------------------------------------------------------------------|------------|------------|------------|------------------------|
| 0                                     | 5574.425                                                                       | 5080.312   | 5270.3250  | 5308.367   | 249.238                |
| 50                                    | 48351.480                                                                      | 48890.650  | 47905.540  | 48382.560  | 493.28                 |
| 100                                   | 93870.210                                                                      | 93252.710  | 94087.670  | 93736.860  | 433.157                |
| 150                                   | 120568.205                                                                     | 120930.480 | 121510.820 | 121003.168 | 475.492                |
| 200                                   | 186041.709                                                                     | 185256.910 | 185340.540 | 185546.400 | 430.995                |
| 250                                   | 265139.693                                                                     | 265354.512 | 264473.109 | 264989.105 | 459.592                |
| 300                                   | 353364.795                                                                     | 354162.629 | 353290.106 | 353726.367 | 483.634                |
